# Supplementary material for: Exploiting ELIOT for Scaffold-Repurposing Opportunities: TRIM33 a Possible Novel E3 Ligase to Expand the Toolbox for PROTAC Design
Source: MDPI journal article supplement (doi:10.3390/ijms232214218), 2022-11-17
Supplement: s1 [file s1]

# Exploiting ELIOT for scaffold-repurposing opportunities: TRIM33 a possible novel E3 ligase to expand the toolbox for PROTAC design

Tommaso Palomba<sup>1</sup>, Giusy Tassone<sup>2</sup>, Carmine Vacca<sup>1</sup>, Matteo Bartalucci<sup>1</sup>, Aurora Valeri<sup>3</sup>, Cecilia Pozzi<sup>2</sup>, Simon Cross<sup>4</sup>, Lydia Siragusa<sup>3,4\*</sup> and Jenny Desantis<sup>1\*</sup>

<sup>1</sup> Department of Chemistry, Biology, and Biotechnology, University of Perugia, Via Elce di Sotto, 8, 06132 Perugia, Italy

<sup>2</sup> Department of Biotechnology, Chemistry and Pharmacy, University of Siena, Via Aldo Moro 2, I-53100 Siena, Italy

<sup>3</sup> Molecular Horizon srl, Via Montelino, 20, 06084, Bettona (PG), Italy

<sup>4</sup> Molecular Discovery Ltd., Kinetic Business Centre, Theobald Street, Elstree, Borehamwood, Hertfordshire WD6 4PJ, U.K.

\* Correspondence: jenny.desantis@unipg.it; lydia@moldiscovery.com;  
Tel.: +39 075 5855262 (J.D.); +39 075 5855550 (L.S.)

## Supporting Information

### Contents

|                                                                                              |    |
|----------------------------------------------------------------------------------------------|----|
| <b>Integrative results</b> .....                                                             | 3  |
| 1.1 TRIM33 BioGRID interactors .....                                                         | 3  |
| 1.2 Information of the structures present in the PDB and used in this work .....             | 12 |
| 1.3 Comparison of the main contact regions of the KAc pocket .....                           | 13 |
| 1.4 Energetic scanning of residues .....                                                     | 13 |
| 1.5 Consideration about the X-ray conserved water molecule .....                             | 16 |
| 1.6 Docking in TRIM33 $\alpha$ without the conserved water molecule .....                    | 17 |
| 1.7 Docking in TRIM33 $\beta$ .....                                                          | 18 |
| 1.8 Comparison between the canonical BRD of TRIM24 and the not-canonical BRD of TRIM28 ..... | 19 |
| 1.9 K <sub>d</sub> determination of the Peptide/TRIM systems.....                            | 20 |
| 1.10 Possible chain conformations from docking analysis .....                                | 21 |
| 1.11 TRIM33 $\alpha$ ligands: Experimental binding mode vs Predicted pose .....              | 22 |
| <b>Experimental section</b> .....                                                            | 23 |
| 2.1 HTRF assay .....                                                                         | 23 |
| HTRF reagents .....                                                                          | 23 |
| Proteins, peptides and ligands .....                                                         | 23 |

|                                                                                                                            |           |
|----------------------------------------------------------------------------------------------------------------------------|-----------|
| Filter set .....                                                                                                           | 24        |
| Kit and peptide selection procedure .....                                                                                  | 24        |
| Peptide titration procedure.....                                                                                           | 25        |
| Competition binding procedure .....                                                                                        | 25        |
| Data analysis.....                                                                                                         | 25        |
| 2.2 Chemistry .....                                                                                                        | 27        |
| General Synthetic Chemistry Methods .....                                                                                  | 27        |
| 1,3-Dimethyl-5-nitro-1H-benzo[d]imidazol-2(3H)-one (S11) .....                                                             | 27        |
| 5-Amino-1,3-dimethyl-1H-benzo[d]imidazol-2(3H)-one (5) .....                                                               | 28        |
| 5-Amino-6-bromo-1,3-dimethyl-1H-benzo[d]imidazole-2(3H)-one (S12) .....                                                    | 28        |
| N-(6-Bromo-1,3-dimethyl-2-oxo-2,3-dihydro-1H-benzo[d]imidazol-5-yl)-2,2,2-trifluoroacetamide (S13) .....                   | 28        |
| 5-Amino-1,3-dimethyl-6-(3-propoxyphenoxy)-1H-benzo[d]imidazol-2(3H)-one (S15).....                                         | 28        |
| N-(1,3-Dimethyl-2-oxo-6-(3-propoxyphenoxy)-2,3-dihydro-1H-benzo[d]imidazol-5-yl)-3,4-dimethoxybenzenesulfonamide (4) ..... | 29        |
| 3-propoxyphenol (S14).....                                                                                                 | 29        |
| 2-Oxo-2,3-dihydro-1H-benzo[d]imidazole-5-carbonitrile (S16) .....                                                          | 29        |
| 1,3-Dimethyl-2-oxo-2,3-dihydro-1H-benzo[d]imidazole-5-carbonitrile .....                                                   | 30        |
| 5-(Aminomethyl)-1,3-dimethyl-1H-benzo[d]imidazol-2(3H)-one (6) .....                                                       | 30        |
| General Procedure A for reductive amination.....                                                                           | 30        |
| 5-(((3-(Dimethylamino)propyl)amino)methyl)-1,3-dimethyl-1H-benzo[d]imidazol-2(3H)-one (7) .                                | 30        |
| 5-(((3-(Diethylamino)propyl)amino)methyl)-1,3-dimethyl-1H-benzo[d]imidazol-2(3H)-one (8) .....                             | 31        |
| 5-(((4-(Dimethylamino)butyl)amino)methyl)-1,3-dimethyl-1H-benzo[d]imidazol-2(3H)-one (9) ....                              | 31        |
| 1,3-Dimethyl-5-(((3-(pyrrolidin-1-yl)propyl)amino)methyl)-1H-benzo[d]imidazol-2(3H)-one (10).                              | 31        |
| 2.3 Crystallographic studies .....                                                                                         | 31        |
| TRIM33α PHD-BRD expression and purification .....                                                                          | 31        |
| Crystallization .....                                                                                                      | 32        |
| Data collection, structure solution and refinement .....                                                                   | 32        |
| <b>Bibliography .....</b>                                                                                                  | <b>34</b> |

# Integrative results

## 1.1 TRIM33 BioGRID interactors

**Table S1.** TRIM33 interactors exported from BioGRID. Interactors from *H. sapiens*, *M. musculus*, MERS-CoV, *R. norvegicus* and *X. laevis* are reported.

| Interactor | Organism          | Aliases                                                                    | Description                                                      |
|------------|-------------------|----------------------------------------------------------------------------|------------------------------------------------------------------|
| ACY1       | <i>H. sapiens</i> | ACY1D, ACY-1, HEL-S-5                                                      | aminoacylase 1                                                   |
| ADCK3      | <i>H. sapiens</i> | COQ8, SCAR9, ARCA2, PP265, CABC1, COQ10D4                                  | aarF domain containing kinase 3                                  |
| ANAPC1     | <i>H. sapiens</i> | MCPR, APC1, TSG24                                                          | anaphase promoting complex subunit 1                             |
| ANAPC4     | <i>H. sapiens</i> | APC4                                                                       | anaphase promoting complex subunit 4                             |
| ANAPC5     | <i>H. sapiens</i> | APC5                                                                       | anaphase promoting complex subunit 5                             |
| ANAPC7     | <i>H. sapiens</i> | APC7                                                                       | anaphase promoting complex subunit 7                             |
| ANGEL1     | <i>H. sapiens</i> | Ccr4e, KIAA0759                                                            | angel homolog 1 ( <i>Drosophila</i> )                            |
| ANKRD28    | <i>H. sapiens</i> | PITK, PPP1R65                                                              | ankyrin repeat domain 28                                         |
| AOX1       | <i>H. sapiens</i> | AO, AOH1                                                                   | aldehyde oxidase 1                                               |
| AR         | <i>H. sapiens</i> | KD, TFM, AIS, SBMA, DHTR, NR3C4, HYSP1, SMAX1, HUMARA, RP11-383C12.1       | androgen receptor                                                |
| ARF5       | <i>H. sapiens</i> | -                                                                          | ADP-ribosylation factor 5                                        |
| ARID1B     | <i>H. sapiens</i> | OSA2, P250R, DAN15, MRD12, 6A3-5, BRIGHT, BAF250B, ELD/OSA1, RP11-419L10.1 | AT rich interactive domain 1B (SWI1-like)                        |
| ASF1A      | <i>H. sapiens</i> | CIA, CGI-98, HSPC146, RP3-329L24.1                                         | anti-silencing function 1A histone chaperone                     |
| ASS1       | <i>H. sapiens</i> | ASS, CTLN1, RP11-618A20.2                                                  | argininosuccinate synthase 1                                     |
| B4GALT2    | <i>H. sapiens</i> | B4Gal-T2, B4Gal-T3, beta4Gal-T2                                            | UDP-Gal:betaGlcNAc beta 1,4-galactosyltransferase, polypeptide 2 |
| BAG2       | <i>H. sapiens</i> | BAG-2, dJ417I1.2, RP3-496N17.2                                             | BCL2-associated athanogene 2                                     |
| BCKDHA     | <i>H. sapiens</i> | MSU, MSUD1, OVD1A, BCKDE1A                                                 | branched chain keto acid dehydrogenase E1, alpha polypeptide     |
| BCKDHB     | <i>H. sapiens</i> | E1B, dJ279A18.1, RP1-279A18.1                                              | branched chain keto acid dehydrogenase E1, beta polypeptide      |
| BRCA1      | <i>H. sapiens</i> | IRIS, PSCP, FANCS, RNF53, BRCC1, PNCA4, BRCAI, PPP1R53, BROVCA1            | breast cancer 1, early onset                                     |
| BRD1       | <i>H. sapiens</i> | BRL, BRPF2, BRPF1, RP3-522J7.4                                             | bromodomain containing 1                                         |
| BRD4       | <i>H. sapiens</i> | CAP, MCAP, HUNKI, HUNK1                                                    | bromodomain containing 4                                         |
| BTBD18     | <i>H. sapiens</i> | hCG_1730474                                                                | BTB (POZ) domain containing 18                                   |
| BUB1B      | <i>H. sapiens</i> | MVA1, SSK1, Bub1A, MAD3L, BUBR1, hBUBR1, BUB1beta                          | BUB1 mitotic checkpoint serine/threonine kinase B                |
| C12ORF74   | <i>H. sapiens</i> | -                                                                          | chromosome 12 open reading frame 74                              |
| C17ORF53   | <i>H. sapiens</i> | -                                                                          | chromosome 17 open reading frame 53                              |

|          |            |                                                                |                                                                       |
|----------|------------|----------------------------------------------------------------|-----------------------------------------------------------------------|
| C22ORF15 | H. sapiens | N27C7-3                                                        | chromosome 22 open reading frame 15                                   |
| C9ORF78  | H. sapiens | HCA59, HSPC220, bA409K20.3                                     | chromosome 9 open reading frame 78                                    |
| CALM1    | H. sapiens | caM, CAMI, PHKD, DD132, CPVT4, CALML2                          | calmodulin 1 (phosphorylase kinase, delta)                            |
| CALU     | H. sapiens | -                                                              | calumenin                                                             |
| CAV1     | H. sapiens | CGL3, PPH3, LCCNS, VIP21, BSCL3, MSTP085                       | caveolin 1, caveolae protein, 22kDa                                   |
| CBFA2T3  | H. sapiens | ETO2, MTG16, MTGR2, ZMYND4                                     | core-binding factor, runt domain, alpha subunit 2; translocated to, 3 |
| CBX3     | H. sapiens | HECH, HP1-GAMMA, HP1Hs-gamma                                   | chromobox homolog 3                                                   |
| CCNA2    | H. sapiens | CCN1, CCNA                                                     | cyclin A2                                                             |
| CCT8L2   | H. sapiens | CESK1                                                          | chaperonin containing TCP1, subunit 8 (theta)-like 2                  |
| CDC16    | H. sapiens | APC6, CUT9, ANAPC6, RP11-569D9.4                               | cell division cycle 16                                                |
| CDC20    | H. sapiens | CDC20A, p55CDC, bA276H19.3                                     | cell division cycle 20                                                |
| CDC23    | H. sapiens | APC8, CUT23, ANAPC8                                            | cell division cycle 23                                                |
| CDC27    | H. sapiens | HNUC, NUC2, APC3, H-NUC, ANAPC3, CDC27Hs, D0S1430E, D17S978E   | cell division cycle 27                                                |
| CDK9     | H. sapiens | TAK, CTK1, C-2k, CDC2L4, PITALRE, RP11-228B15.5                | cyclin-dependent kinase 9                                             |
| CEP78    | H. sapiens | IP63, C9orf81, RP11-336N8.5                                    | centrosomal protein 78kDa                                             |
| CHAMP1   | H. sapiens | CAMP, CHAMP, ZNF828, C13orf8                                   | chromosome alignment maintaining phosphoprotein 1                     |
| CHD1L    | H. sapiens | CHDL, ALC1                                                     | chromodomain helicase DNA binding protein 1-like                      |
| CHEK1    | H. sapiens | CHK1                                                           | checkpoint kinase 1                                                   |
| CLTC     | H. sapiens | Hc, CHC, CHC17, CLH-17, CLTCL2                                 | clathrin, heavy chain (Hc)                                            |
| CNKSRI   | H. sapiens | CNK, CNK1                                                      | connector enhancer of kinase suppressor of Ras 1                      |
| CREBBP   | H. sapiens | CBP, RSTS, KAT3A                                               | CREB binding protein                                                  |
| CRYAA    | H. sapiens | HSPB4, CRYA1, CTRCT9                                           | crystallin, alpha A                                                   |
| CRYAB    | H. sapiens | MFM2, HSPB5, CTPP2, CRYA2, CMD1II, CTRCT16, HEL-S-101          | crystallin, alpha B                                                   |
| CTNNA1   | H. sapiens | CAP102                                                         | catenin (cadherin-associated protein), alpha 1, 102kDa                |
| CTNNB1   | H. sapiens | CTNNB, MRD19, armadillo, OK/SW-cl.35                           | catenin (cadherin-associated protein), beta 1, 88kDa                  |
| CUL3     | H. sapiens | CUL-3, PHA2E                                                   | cullin 3                                                              |
| CYLD     | H. sapiens | SBS, TEM, EAC, MFT, CDMT, MFT1, BRSS, CYLD1, USPL2, CYLDI, ... | cylindromatosis (turban tumor syndrome)                               |
| DBT      | H. sapiens | E2, E2B, BCATE2, BCKADE2, BCKAD-E2, RP11-305E17.3              | dihydrolipoamide branched chain transacylase E2                       |
| DCAF15   | H. sapiens | C19orf72                                                       | DDB1 and CUL4 associated factor 15                                    |
| DCAF7    | H. sapiens | AN11, WDR68, HAN11, SWAN-1                                     | DDB1 and CUL4 associated factor 7                                     |
| DGKE     | H. sapiens | DGK, DAGK5, DAGK6, NPHS7                                       | diacylglycerol kinase, epsilon 64kDa                                  |
| DHX33    | H. sapiens | DDX33                                                          | DEAH (Asp-Glu-Ala-His) box polypeptide 33                             |

|         |            |                                                               |                                                                           |
|---------|------------|---------------------------------------------------------------|---------------------------------------------------------------------------|
| DNAJC10 | H. sapiens | MTHr, JPDI, ERdj5, PDIA19, UNQ495/PRO1012                     | DnaJ (Hsp40) homolog, subfamily C, member 10                              |
| DPP7    | H. sapiens | QPP, DPP2, DPPII                                              | dipeptidyl-peptidase 7                                                    |
| EDEM3   | H. sapiens | C1orf22                                                       | ER degradation enhancer, mannosidase alpha-like 3                         |
| EGFR    | H. sapiens | ERBB, HER1, mENA, PIG61, ERBB1, NISBD2                        | epidermal growth factor receptor                                          |
| EIF3A   | H. sapiens | p185, EIF3, P167, p180, TIF32, EIF3S10, eIF3-p170, eIF3-theta | eukaryotic translation initiation factor 3, subunit A                     |
| ELAVL1  | H. sapiens | HUR, Hua, MeIG, ELAV1                                         | ELAV like RNA binding protein 1                                           |
| ELF4    | H. sapiens | MEF, ELFR, RP3-510021.2                                       | E74-like factor 4 (ets domain transcription factor)                       |
| ELF5    | H. sapiens | ESE2                                                          | E74-like factor 5 (ets domain transcription factor)                       |
| EPAS1   | H. sapiens | HLF, MOP2, HIF2A, ECT4, PASD2, bHLHe73                        | endothelial PAS domain protein 1                                          |
| ERC1    | H. sapiens | ELKS, Cast2, ERC-1, RAB6IP2                                   | ELKS/RAB6-interacting/CAST family member 1                                |
| ERG     | H. sapiens | p55, erg-3                                                    | v-ets avian erythroblastosis virus E26 oncogene homolog                   |
| ESR1    | H. sapiens | ER, ESR, Era, ESRA, ESTRR, NR3A1, RP1-130E4.1                 | estrogen receptor 1                                                       |
| ESR2    | H. sapiens | Erb, ESRB, NR3A2, ESTRB, ER-BETA, ESR-BETA                    | estrogen receptor 2 (ER beta)                                             |
| EWSR1   | H. sapiens | EWS, bK984G1.4, AC002059.7                                    | EWS RNA-binding protein 1                                                 |
| EZH2    | H. sapiens | WVS, ENX1, WVS2, KMT6, EZH1, ENX-1, EZH2b, KMT6A              | enhancer of zeste 2 polycomb repressive complex 2 subunit                 |
| FAM53C  | H. sapiens | C5orf6                                                        | family with sequence similarity 53, member C                              |
| FBN2    | H. sapiens | CCA, DA9, EOMD                                                | fibrillin 2                                                               |
| FGA     | H. sapiens | Fib2                                                          | fibrinogen alpha chain                                                    |
| FHL3    | H. sapiens | SLIM2                                                         | four and a half LIM domains 3                                             |
| FHL5    | H. sapiens | ACT, dJ393D12.2, RP3-393D12.2                                 | four and a half LIM domains 5                                             |
| FOS     | H. sapiens | p55, AP-1, C-FOS                                              | FBJ murine osteosarcoma viral oncogene homolog                            |
| FOXA1   | H. sapiens | HNF3A, TCF3A                                                  | forkhead box A1                                                           |
| FOXF2   | H. sapiens | FKHL6, FREAC2, FREAC-2                                        | forkhead box F2                                                           |
| FOXI1   | H. sapiens | HFH3, HFH-3, FKHL10, FREAC6, FKHL10, FREAC-6                  | forkhead box I1                                                           |
| FZR1    | H. sapiens | FZR, FZR2, HCDH, CDH1, HCDH1, CDC20C                          | fizzy/cell division cycle 20 related 1 (Drosophila)                       |
| GCDH    | H. sapiens | GCD, ACAD5                                                    | glutaryl-CoA dehydrogenase                                                |
| GCHFR   | H. sapiens | P35, GFRP, HsT16933                                           | GTP cyclohydrolase I feedback regulator                                   |
| GFOD1   | H. sapiens | ADG-90, C6orf114, RP11-501I19.1                               | glucose-fructose oxidoreductase domain containing 1                       |
| GGCX    | H. sapiens | VKCFD1                                                        | gamma-glutamyl carboxylase                                                |
| GNB2L1  | H. sapiens | HLC7, HLC-7, H12.3, PIG21, RACK1, Gnb2-rs1                    | guanine nucleotide binding protein (G protein), beta polypeptide 2-like 1 |

|          |            |                                                                            |                                                                  |
|----------|------------|----------------------------------------------------------------------------|------------------------------------------------------------------|
| GPX1     | H. sapiens | GPXD, GSHPX1                                                               | glutathione peroxidase 1                                         |
| GSPT1    | H. sapiens | GST1, eRF3a, ETF3A, 551G9.2                                                | G1 to S phase transition 1                                       |
| HAO2     | H. sapiens | HAOX2, GIG16, RP5-871G17.1                                                 | hydroxyacid oxidase 2 (long chain)                               |
| HDAC6    | H. sapiens | HD6, JM21, CPBHM, PPP1R90                                                  | histone deacetylase 6                                            |
| HIST1H3A | H. sapiens | H3FA, H3/A                                                                 | histone cluster 1, H3a                                           |
| HNF4A    | H. sapiens | TCF, MODY, HNF4, FRTS4, TCF14, MODY1, NR2A1, HNF4a9, HNF4a8, HNF4a7, ...   | hepatocyte nuclear factor 4, alpha                               |
| HOXC5    | H. sapiens | HOX3, CP11, HOX3D                                                          | homeobox C5                                                      |
| HSPA2    | H. sapiens | HSP70-2, HSP70-3                                                           | heat shock 70kDa protein 2                                       |
| HSPA8    | H. sapiens | LAP1, NIP71, LAP-1, HSC70, HSC71, HSC54, HSP71, HSP73, HEL-33, HSPA10, ... | heat shock 70kDa protein 8                                       |
| HSPB2    | H. sapiens | MKBP, HSP27, Hs.78846, LOH11CR1K                                           | heat shock 27kDa protein 2                                       |
| HSPH1    | H. sapiens | HSP105, HSP105B, HSP105A, NY-CO-25, RP11-173P16.1                          | heat shock 105kDa/110kDa protein 1                               |
| IMMP1L   | H. sapiens | IMP1, IMP1-LIKE                                                            | IMP1 inner mitochondrial membrane peptidase-like (S. cerevisiae) |
| JUN      | H. sapiens | AP1, AP-1, c-Jun                                                           | jun proto-oncogene                                               |
| KCTD17   | H. sapiens | RP5-1170K4.4                                                               | potassium channel tetramerization domain containing 17           |
| KDM5C    | H. sapiens | SMCX, MRXJ, XE169, MRXSJ, MRX13, MRXSCJ, JARID1C, DXS1272E, RP11-258C19.2  | lysine (K)-specific demethylase 5C                               |
| KIAA1429 | H. sapiens | MSTP054, fSAP121                                                           | KIAA1429                                                         |
| KIAA1551 | H. sapiens | C12orf35                                                                   | KIAA1551                                                         |
| KIF11    | H. sapiens | EG5, HKSP, MCLMR, TRIP5, KNSL1                                             | kinesin family member 11                                         |
| KIF5B    | H. sapiens | KNS, UKHC, KINH, KNS1, HEL-S-61                                            | kinesin family member 5B                                         |
| KLC1     | H. sapiens | KLC, KNS2, KNS2A, RP11-73M18.7                                             | kinesin light chain 1                                            |
| KLC2     | H. sapiens | -                                                                          | kinesin light chain 2                                            |
| KLF8     | H. sapiens | BKLF3, ZNF741, RP13-1021K9.1                                               | Kruppel-like factor 8                                            |
| KLHL20   | H. sapiens | KLEIP, KHLHX, KLHLX, RP3-383J4.3                                           | kelch-like family member 20                                      |
| KLK9     | H. sapiens | KLKL3, KLK-L3                                                              | kallikrein-related peptidase 9                                   |
| KPNA1    | H. sapiens | RCH2, SRP1, IPOA5, NPI-1                                                   | karyopherin alpha 1 (importin alpha 5)                           |
| KPNA6    | H. sapiens | KPNA7, IPOA7, RP4-622L5.1                                                  | karyopherin alpha 6 (importin alpha 7)                           |
| KRT37    | H. sapiens | K37, HA7, KRTHA7                                                           | keratin 37                                                       |
| KRT38    | H. sapiens | HA8, hHa8, KRTHA8                                                          | keratin 38                                                       |
| KRT39    | H. sapiens | K39, KA35, CK-39                                                           | keratin 39                                                       |
| LARP1    | H. sapiens | LARP                                                                       | La ribonucleoprotein domain family, member 1                     |
| LCE3D    | H. sapiens | LEP16, SPRL6B, SPRL6A                                                      | late cornified envelope 3D                                       |
| LDB1     | H. sapiens | NLI, CLIM2                                                                 | LIM domain binding 1                                             |
| LHX4     | H. sapiens | CPHD4                                                                      | LIM homeobox 4                                                   |
| LHX6     | H. sapiens | LHX6.1, RP11-498E2.6                                                       | LIM homeobox 6                                                   |
| LMNB1    | H. sapiens | LMN, LMN2, ADLD, LMNB                                                      | lamin B1                                                         |

|          |            |                                                                        |                                                             |
|----------|------------|------------------------------------------------------------------------|-------------------------------------------------------------|
| LMO2     | H. sapiens | TTG2, RHOM2, RBTN2, RBTN1                                              | LIM domain only 2 (rhombotin-like 1)                        |
| LOXL4    | H. sapiens | LOXC                                                                   | lysyl oxidase-like 4                                        |
| LRP2     | H. sapiens | DBS, GP330                                                             | low density lipoprotein receptor-related protein 2          |
| LRPPRC   | H. sapiens | LSFC, GP130, LRP130, CLONE-23970                                       | leucine-rich pentatricopeptide repeat containing            |
| LURAP1   | H. sapiens | LRP35A, LRAP35a, C1orf190                                              | leucine rich adaptor protein 1                              |
| LY6G5B   | H. sapiens | G5b, C6orf19, DADB-127H9.9                                             | lymphocyte antigen 6 complex, locus G5B                     |
| LYL1     | H. sapiens | bHLHa18                                                                | lymphoblastic leukemia associated hematopoiesis regulator 1 |
| MAD2L1   | H. sapiens | MAD2, HSMAD2                                                           | MAD2 mitotic arrest deficient-like 1 (yeast)                |
| MAGEA9   | H. sapiens | CT1.9, MAGE9                                                           | melanoma antigen family A, 9                                |
| MAPK6    | H. sapiens | ERK3, PRKM6, p97MAPK, HsT17250                                         | mitogen-activated protein kinase 6                          |
| MCM3     | H. sapiens | P1.h, RLFB, HCC5, P1-MCM3, RP1-108C2.3                                 | minichromosome maintenance complex component 3              |
| MDC1     | H. sapiens | NFBD1, DAAP-285E11.7                                                   | mediator of DNA-damage checkpoint 1                         |
| METTL21B | H. sapiens | FAM119B                                                                | methyltransferase like 21B                                  |
| MLKL     | H. sapiens | hMLKL                                                                  | mixed lineage kinase domain-like                            |
| MTA1     | H. sapiens | -                                                                      | metastasis associated 1                                     |
| MYC      | H. sapiens | MYCC, MRTL, c-Myc, bHLHe39                                             | v-myc avian myelocytomatosis viral oncogene homolog         |
| MYOD1    | H. sapiens | PUM, MYF3, MYOD, bHLHc1                                                | myogenic differentiation 1                                  |
| NAA11    | H. sapiens | ARD2, hARD2, ARD1B                                                     | N(alpha)-acetyltransferase 11, NatA catalytic subunit       |
| NANOG    | H. sapiens | -                                                                      | Nanog homeobox                                              |
| NCOA3    | H. sapiens | AIB1, RAC3, ACTR, SRC3, pCIP, CTG26, SRC-3, AIB-1, TNRC16, TNRC14, ... | nuclear receptor coactivator 3                              |
| NCOR1    | H. sapiens | N-CoR, TRAC1, N-CoR1, hN-CoR, PPP1R109                                 | nuclear receptor corepressor 1                              |
| NELL2    | H. sapiens | NRP2                                                                   | NEL-like 2 (chicken)                                        |
| NID2     | H. sapiens | NID-2                                                                  | nidogen 2 (osteonidogen)                                    |
| NIN      | H. sapiens | SCKL7                                                                  | ninein (GSK3B interacting protein)                          |
| NLGN3    | H. sapiens | HNL3                                                                   | neuroligin 3                                                |
| NSMCE4A  | H. sapiens | NS4EA, NSE4A, PP4762, C10orf86                                         | non-SMC element 4 homolog A (S. cerevisiae)                 |
| NT5DC2   | H. sapiens | -                                                                      | 5'-nucleotidase domain containing 2                         |
| NTRK1    | H. sapiens | TRK, MTC, TRKA, TRK1, Trk-A, p140-TrkA                                 | neurotrophic tyrosine kinase, receptor, type 1              |
| NUP35    | H. sapiens | MP44, NP44, NUP53, MP-44                                               | nucleoporin 35kDa                                           |
| NUP50    | H. sapiens | NPAP60, NPAP60L, CTA-268H5.7                                           | nucleoporin 50kDa                                           |
| NUP62    | H. sapiens | p62, IBSN, SNDI                                                        | nucleoporin 62kDa                                           |
| OSBP     | H. sapiens | OSBP1                                                                  | oxysterol binding protein                                   |
| PBK      | H. sapiens | SPK, TOPK, CT84, HEL164, Nori-3                                        | PDZ binding kinase                                          |
| PDIA4    | H. sapiens | ERP72, ERP70, ERp-72                                                   | protein disulfide isomerase family A, member 4              |

|         |            |                                                             |                                                                                              |
|---------|------------|-------------------------------------------------------------|----------------------------------------------------------------------------------------------|
| PELO    | H. sapiens | CGI-17, PRO1770                                             | pelota homolog (Drosophila)                                                                  |
| PER1    | H. sapiens | PER, hPER, RIGUI                                            | period circadian clock 1                                                                     |
| PEX5    | H. sapiens | PXR1, PBD2A, PTS1R, PBD2B, PTS1-BP                          | peroxisomal biogenesis factor 5                                                              |
| PIP4K2C | H. sapiens | PIP5K2C                                                     | phosphatidylinositol-5-phosphate 4-kinase, type II, gamma                                    |
| PJA2    | H. sapiens | RNF131, Neurodap1                                           | praja ring finger 2, E3 ubiquitin protein ligase                                             |
| PLEKHA4 | H. sapiens | PEPP1                                                       | pleckstrin homology domain containing, family A (phosphoinositide binding specific) member 4 |
| PML     | H. sapiens | MYL, RNF71, TRIM19, PP8675                                  | promyelocytic leukemia                                                                       |
| PNMA1   | H. sapiens | MA1                                                         | paraneoplastic Ma antigen 1                                                                  |
| PNMA2   | H. sapiens | MA2, MM2, RGAG2                                             | paraneoplastic Ma antigen 2                                                                  |
| POGZ    | H. sapiens | ZNF635, ZNF280E, ZNF635m, RP11-806J18.2                     | pogo transposable element with ZNF domain                                                    |
| POLR2C  | H. sapiens | RPB3, RPB31, hRPB33, hsRPB3, A-152E5.7                      | polymerase (RNA) II (DNA directed) polypeptide C, 33kDa                                      |
| PRR20A  | H. sapiens | PRR20                                                       | proline rich 20A                                                                             |
| PSMB7   | H. sapiens | Z, RP11-101K10.7                                            | proteasome (prosome, macropain) subunit, beta type, 7                                        |
| PSME3   | H. sapiens | Ki, PA28G, REG-GAMMA, PA28gamma, HEL-S-283, PA28-gamma      | proteasome (prosome, macropain) activator subunit 3 (PA28 gamma; Ki)                         |
| PTPN11  | H. sapiens | CFC, NS1, SHP2, BPTP3, PTP2C, PTP-1D, SH-PTP3, SH-PTP2      | protein tyrosine phosphatase, non-receptor type 11                                           |
| PYCRL   | H. sapiens | -                                                           | pyrroline-5-carboxylate reductase-like                                                       |
| QPRT    | H. sapiens | QPRTase, HEL-S-90n                                          | quinolinate phosphoribosyltransferase                                                        |
| RABGGTB | H. sapiens | GGTB, RP4-682C21.3                                          | Rab geranylgeranyltransferase, beta subunit                                                  |
| RAD50   | H. sapiens | NBSLD, RAD502, hRad50                                       | RAD50 homolog (S. cerevisiae)                                                                |
| RBMX    | H. sapiens | RNMX, HNRPG, RBMXP1, RBMXRT, HNRNPG, hnRNP-G, RP11-1114A5.1 | RNA binding motif protein, X-linked                                                          |
| RCN1    | H. sapiens | RCN, RCAL, PIG20, HEL-S-84                                  | reticulocalbin 1, EF-hand calcium binding domain                                             |
| RCN2    | H. sapiens | E6BP, ERC55, ERC-55, TCBP49                                 | reticulocalbin 2, EF-hand calcium binding domain                                             |
| RFC4    | H. sapiens | A1, RFC37                                                   | replication factor C (activator 1) 4, 37kDa                                                  |
| RNF31   | H. sapiens | HOIP, ZIBRA                                                 | ring finger protein 31                                                                       |
| RPAP3   | H. sapiens | -                                                           | RNA polymerase II associated protein 3                                                       |
| RPS6KA6 | H. sapiens | RSK4, PP90RSK4                                              | ribosomal protein S6 kinase, 90kDa, polypeptide 6                                            |
| RRAGC   | H. sapiens | RAGC, GTR2, TIB929                                          | Ras-related GTP binding C                                                                    |
| RRM1    | H. sapiens | R1, RR1, RIR1                                               | ribonucleotide reductase M1                                                                  |
| RUNX1   | H. sapiens | AML1, CBFA2, EVI-1, AMLCR1, PEBP2aB, AML1-EVI-1             | runt-related transcription factor 1                                                          |



|         |            |                                                                         |                                                                                                   |
|---------|------------|-------------------------------------------------------------------------|---------------------------------------------------------------------------------------------------|
| RUNX1T1 | H. sapiens | CDR, ETO, MTG8, AML1T1, ZMYND2, CBFA2T1                                 | runt-related transcription factor 1; translocated to, 1 (cyclin D-related)                        |
| SAT1    | H. sapiens | SAT, DC21, SSAT, KFSD, KFSDX, SSAT-1                                    | spermidine/spermine N1-acetyltransferase 1                                                        |
| SCO2    | H. sapiens | MYP6, SCO1L, CEMCOX1                                                    | SCO2 cytochrome c oxidase assembly protein                                                        |
| SDF4    | H. sapiens | Cab45, SDF-4, RP5-902P8.6                                               | stromal cell derived factor 4                                                                     |
| SHARPIN | H. sapiens | SIPL1, PSEC0216                                                         | SHANK-associated RH domain interactor                                                             |
| SHFM1   | H. sapiens | ECD, SEM1, DSS1, SHFD1, SHSF1, Shfdg1                                   | split hand/foot malformation (ectrodactyly) type 1                                                |
| SKI     | H. sapiens | SGS, SKV                                                                | SKI proto-oncogene                                                                                |
| SKIL    | H. sapiens | SNO, SnoA, SnoN, Snol                                                   | SKI-like proto-oncogene                                                                           |
| SKIV2L  | H. sapiens | HLP, SKI2, 170A, DDX13, SKIV2, THES2, SKI2W, DADB-112B14.3              | superkiller viralicidic activity 2-like (S. cerevisiae)                                           |
| SLFN11  | H. sapiens | SLFN8/9                                                                 | schlafen family member 11                                                                         |
| SLK     | H. sapiens | LOSK, STK2, se20-9, bA16H23.1                                           | STE20-like kinase                                                                                 |
| SMAD2   | H. sapiens | JV18, MADR2, MADH2, hMAD-2, hSMAD2, JV18-1                              | SMAD family member 2                                                                              |
| SMAD3   | H. sapiens | LDS3, MADH3, LDS1C, JV15-2, HSPC193, HsT17436                           | SMAD family member 3                                                                              |
| SMAD4   | H. sapiens | JIP, DPC4, MYHRS, MADH4                                                 | SMAD family member 4                                                                              |
| SMARCA4 | H. sapiens | BRG1, SWI2, SNF2, RTPS2, MRD16, SNF2L4, SNF2LB, BAF190, hSNF2b, BAF190A | SWI/SNF related, matrix associated, actin dependent regulator of chromatin, subfamily a, member 4 |
| SMARCC1 | H. sapiens | Rsc8, SRG3, SWI3, CRACC1, BAF155                                        | SWI/SNF related, matrix associated, actin dependent regulator of chromatin, subfamily c, member 1 |
| SMARCC2 | H. sapiens | Rsc8, CRACC2, BAF170                                                    | SWI/SNF related, matrix associated, actin dependent regulator of chromatin, subfamily c, member 2 |
| SMS     | H. sapiens | SRS, SpS, MRSR, SPMSY                                                   | spermine synthase                                                                                 |
| SOD1    | H. sapiens | SOD, ALS, IPOA, ALS1, hSod1, HEL-S-44, homodimer                        | superoxide dismutase 1, soluble                                                                   |
| SOHLH1  | H. sapiens | TEB2, NOHLH, SPATA27, bHLHe80, C9orf157, bA100C15.3, RP11-100C15.3      | spermatogenesis and oogenesis specific basic helix-loop-helix 1                                   |
| SOX17   | H. sapiens | VUR3                                                                    | SRY (sex determining region Y)-box 17                                                             |
| SOX2    | H. sapiens | ANOP3, MCOPS3                                                           | SRY (sex determining region Y)-box 2                                                              |
| SP100   | H. sapiens | lysp100b                                                                | SP100 nuclear antigen                                                                             |
| SP7     | H. sapiens | OSX, OI12, OI11, osterix                                                | Sp7 transcription factor                                                                          |
| SSB     | H. sapiens | La, LARP3, La/SSB                                                       | Sjogren syndrome antigen B (autoantigen La)                                                       |
| SSBP2   | H. sapiens | SOSS-B2, HSPC116                                                        | single-stranded DNA binding protein 2                                                             |
| SSBP3   | H. sapiens | SSDP, CSDP, SSDP1, RP5-997D24.2                                         | single stranded DNA binding protein 3                                                             |
| SSBP4   | H. sapiens | -                                                                       | single stranded DNA binding protein 4                                                             |

|         |            |                                                                            |                                                                                |
|---------|------------|----------------------------------------------------------------------------|--------------------------------------------------------------------------------|
| SSRP1   | H. sapiens | T160, FACT, FACT80                                                         | structure specific recognition protein 1                                       |
| SSSCA1  | H. sapiens | p27                                                                        | Sjogren syndrome/scleroderma autoantigen 1                                     |
| ST13    | H. sapiens | HIP, HOP, P48, SNC6, AAG2, HSPABP, HSPABP1, FAM10A1, PRO0786, FAM10A4, ... | suppression of tumorigenicity 13 (colon carcinoma) (Hsp70 interacting protein) |
| SUMO2   | H. sapiens | Smt3A, SUMO3, SMT3B, HSMT3, SMT3H2                                         | small ubiquitin-like modifier 2                                                |
| SUPT16H | H. sapiens | CDC68, FACTP140, SPT16/CDC68                                               | suppressor of Ty 16 homolog (S. cerevisiae)                                    |
| TAL1    | H. sapiens | SCL, TCL5, tal-1, bHLHa17                                                  | T-cell acute lymphocytic leukemia 1                                            |
| TBL1X   | H. sapiens | EBI, TBL1, SMAP55                                                          | transducin (beta)-like 1X-linked                                               |
| TBL1XR1 | H. sapiens | C21, IRA1, DC42, TBLR1                                                     | transducin (beta)-like 1 X-linked receptor 1                                   |
| TCEB2   | H. sapiens | ELOB, SIII                                                                 | transcription elongation factor B (SIII), polypeptide 2 (18kDa, elongin B)     |
| TCF12   | H. sapiens | HEB, CRS3, HTF4, bHLHb20, HsT17266                                         | transcription factor 12                                                        |
| TCF3    | H. sapiens | E47, E2A, VDIR, ITF1, TCF-3, bHLHb21                                       | transcription factor 3                                                         |
| TCF4    | H. sapiens | SEF2, ITF2, E2-2, PTHS, TCF-4, SEF-2, ITF-2, SEF2-1, bHLHb19, SEF2-1B, ... | transcription factor 4                                                         |
| TERF2IP | H. sapiens | RAP1, DRIP5, PP8000                                                        | telomeric repeat binding factor 2, interacting protein                         |
| TEX13B  | H. sapiens | TGC3B, TSGA5                                                               | testis expressed 13B                                                           |
| TGM7    | H. sapiens | TGMZ                                                                       | transglutaminase 7                                                             |
| THOC1   | H. sapiens | P84, HPR1, P84N5                                                           | THO complex 1                                                                  |
| THRSP   | H. sapiens | S14, Lpgp, THRP, LPGP1, SPOT14                                             | thyroid hormone responsive                                                     |
| TIGD5   | H. sapiens | -                                                                          | tigger transposable element derived 5                                          |
| TIMM50  | H. sapiens | TIM50, TIM50L, PRO1512                                                     | translocase of inner mitochondrial membrane 50 homolog (S. cerevisiae)         |
| TMX3    | H. sapiens | PDIA13, TXNDC10                                                            | thioredoxin-related transmembrane protein 3                                    |
| TP53    | H. sapiens | P53, LFS1, BCC7, TRP53                                                     | tumor protein p53                                                              |
| TP53BP1 | H. sapiens | p202, 53BP1                                                                | tumor protein p53 binding protein 1                                            |
| TPM3    | H. sapiens | TRK, TM5, TM3, CFTD, TM-5, TM30, NEM1, CAPM1, hscp30, TPMsk3, ...          | tropomyosin 3                                                                  |
| TRAF2   | H. sapiens | TRAP, TRAP3, MGC:45012                                                     | TNF receptor-associated factor 2                                               |
| TRIM24  | H. sapiens | TF1A, TIF1, PTC6, RNF82, TIF1A, hTIF1, TIF1ALPHA                           | tripartite motif containing 24                                                 |
| TRIM25  | H. sapiens | EFP, Z147, ZNF147, RNF147                                                  | tripartite motif containing 25                                                 |
| TRIM28  | H. sapiens | TF1B, KAP1, TIF1B, RNF96, PPP1R157                                         | tripartite motif containing 28                                                 |
| TRIM33  | H. sapiens | PTC7, RFG7, ECTO, TF1G, TIF1G, TIFGAMMA, TIF1GAMMA                         | tripartite motif containing 33                                                 |
| TRIM37  | H. sapiens | MUL, POB1, TEF3                                                            | tripartite motif containing 37                                                 |
| TRIM4   | H. sapiens | RNF87                                                                      | tripartite motif containing 4                                                  |
| TRIM52  | H. sapiens | RNF102                                                                     | tripartite motif containing 52                                                 |
| TTC37   | H. sapiens | Ski3, THES, KIAA0372                                                       | tetratricopeptide repeat domain 37                                             |

|         |             |                                                                                    |                                                                              |
|---------|-------------|------------------------------------------------------------------------------------|------------------------------------------------------------------------------|
| TUBB    | H. sapiens  | M40, TUBB5, TUBB1, CDCBM6, OK/SW-cl.56, DAAP-285E11.4                              | tubulin, beta class I                                                        |
| TUBG1   | H. sapiens  | TUBG, GCP-1, CDCBM4, TUBGCP1                                                       | tubulin, gamma 1                                                             |
| UACA    | H. sapiens  | NUCLING                                                                            | uveal autoantigen with coiled-coil domains and ankyrin repeats               |
| UBE2D2  | H. sapiens  | UBC4, UBCH4, PUBC1, UBC4/5, UBCH5B, E2(17)KB2                                      | ubiquitin-conjugating enzyme E2D 2                                           |
| UBE2D3  | H. sapiens  | UBC4/5, UBCH5C, E2(17)KB3                                                          | ubiquitin-conjugating enzyme E2D 3                                           |
| UBE2E1  | H. sapiens  | UBCH6                                                                              | ubiquitin-conjugating enzyme E2E 1                                           |
| UBE2I   | H. sapiens  | P18, UBC9, C358B7.1, LA16c-358B7.1                                                 | ubiquitin-conjugating enzyme E2I                                             |
| UBE2N   | H. sapiens  | UBC13, Ubch13, Ubch-ben, HEL-S-71, UBCHBEN; UBC13                                  | ubiquitin-conjugating enzyme E2N                                             |
| UBXN6   | H. sapiens  | UBXD1, UBXDC2                                                                      | UBX domain protein 6                                                         |
| UNC80   | H. sapiens  | UNC-80, C2orf21                                                                    | unc-80 homolog (C. elegans)                                                  |
| VCP     | H. sapiens  | p97, TERA, ALS14, IBMPFD, HEL-220, IBMPFD1, HEL-S-70                               | valosin containing protein                                                   |
| VDAC2   | H. sapiens  | POR, RP11-375G3.1                                                                  | voltage-dependent anion channel 2                                            |
| WDYHV1  | H. sapiens  | C8orf32                                                                            | WDYHV motif containing 1                                                     |
| XPO1    | H. sapiens  | emb, CRM1, exp1                                                                    | exportin 1                                                                   |
| YWHAB   | H. sapiens  | HS1, GW128, YWHAA, KCIP-1, HEL-S-1, RP1-148E22.1                                   | tyrosine 3-monooxygenase/tryptophan 5-monooxygenase activation protein, beta |
| ZBTB1   | H. sapiens  | ZNF909                                                                             | zinc finger and BTB domain containing 1                                      |
| ZFP82   | H. sapiens  | ZNF545                                                                             | ZFP82 zinc finger protein                                                    |
| ZIM2    | H. sapiens  | ZNF656                                                                             | zinc finger, imprinted 2                                                     |
| ZNF324B | H. sapiens  | -                                                                                  | zinc finger protein 324B                                                     |
| ZNF333  | H. sapiens  | -                                                                                  | zinc finger protein 333                                                      |
| ZNF418  | H. sapiens  | -                                                                                  | zinc finger protein 418                                                      |
| ZNF43   | H. sapiens  | HTF6, KOX27, ZNF39L1                                                               | zinc finger protein 43                                                       |
| ZNF44   | H. sapiens  | ZNF, KOX7, ZNF55, ZNF58, GIOT-2, ZNF504                                            | zinc finger protein 44                                                       |
| ZNF460  | H. sapiens  | HZF8, ZNF272                                                                       | zinc finger protein 460                                                      |
| ZNF484  | H. sapiens  | BA526D8.4, RP11-526D8.9                                                            | zinc finger protein 484                                                      |
| ZNF582  | H. sapiens  | -                                                                                  | zinc finger protein 582                                                      |
| ZNF747  | H. sapiens  | -                                                                                  | zinc finger protein 747                                                      |
| ZNF764  | H. sapiens  | -                                                                                  | zinc finger protein 764                                                      |
| ZNF776  | H. sapiens  | -                                                                                  | zinc finger protein 776                                                      |
| CREBBP  | M. musculus | CBP, KAT3A, CBP/p300, p300/CBP, AW558298                                           | CREB binding protein                                                         |
| NFE2L2  | M. musculus | Nrf2, AI194320, RP23-374O4.2                                                       | nuclear factor, erythroid derived 2, like 2                                  |
| PARP1   | M. musculus | PARP, PPOL, Adprp, ARTD1, parp-1, C80510, Adprt1, sPARP-1, AI893648, 5830444G22Rik | poly (ADP-ribose) polymerase family, member 1                                |
| PIAS1   | M. musculus | GBP, Ddxbp1, 2900068C24Rik                                                         | protein inhibitor of activated STAT 1                                        |
| POU5F1  | M. musculus | Oct4, Oct3, Otf3, Otf4, Otf-3, Otf-4, Oct-3, Oct-4, NF-A3, Otf3g, ...              | POU domain, class 5, transcription factor 1                                  |

|         |               |                                                                                       |                                                                |
|---------|---------------|---------------------------------------------------------------------------------------|----------------------------------------------------------------|
| SPI1    | M. musculus   | Dis1, PU.1, Spi-1, Sfpi1, Dis-1, Sfpi-1, Tcfpu1, Tfpu.1, RP23-20F9.1                  | spleen focus forming virus (SFV) proviral integration oncogene |
| TAL1    | M. musculus   | Scl, tal-1, bHLHa17, SCL/tal-1, RP23-295C20.6                                         | T cell acute lymphocytic leukemia 1                            |
| TFCP2L1 | M. musculus   | Cp2l1, LBP-9, Crtr-1, AA575098, Tcfcp2l1, 4932442M07Rik, 1810030F05Rik, D930018N21Rik | transcription factor CP2-like 1                                |
| TRIM24  | M. musculus   | TIF1, Tif1a, A1447469, TIF1alpha, TIF1-alpha, D430004I05Rik, A130082H20Rik            | tripartite motif-containing 24                                 |
| ORF3    | MERS-CoV      | G128_gp03, ORF3_CVEMC, MERS-CoV ORF3, PRO_0000422435                                  | NS3 protein                                                    |
| SUMO3   | R. norvegicus | -                                                                                     | small ubiquitin-like modifier 3                                |
| SMAD4.1 | X. laevis     | jip, dpc4, smad4, madh4, smad4a, Xsmad4, xsmad4a, smad4alpha, XSmad4alpha             | SMAD family member 4, gene 1                                   |
| XPO1    | X. laevis     | Xpo, crm1, exportin-1                                                                 | exportin 1                                                     |

## 1.2 Information of the structures present in the PDB and used in this work.

**Table S2.** Considered X-ray crystallographic structures.

| PDB  | Method            | Resolution | Gene            | ligandID                     |
|------|-------------------|------------|-----------------|------------------------------|
| 3O33 | X-ray diffraction | 2          | TRIM24          |                              |
| 3O34 | X-ray diffraction | 1.9        | TRIM24          | H3(13-32)K23ac               |
| 3O35 | X-ray diffraction | 1.76       | TRIM24          | H3(23-31)K27ac               |
| 3O36 | X-ray diffraction | 1.7        | TRIM24          | H4(14-19)K16ac               |
| 3O37 | X-ray diffraction | 2          | TRIM24          | H3(1-10)K4                   |
| 4YAB | X-ray diffraction | 1.9        | TRIM24          | 4CN                          |
| 4YAD | X-ray diffraction | 1.73       | TRIM24          | 4A7                          |
| 4YAT | X-ray diffraction | 2.18       | TRIM24          | 4A8                          |
| 4YAX | X-ray diffraction | 2.25       | TRIM24          | 4AE                          |
| 4YBM | X-ray diffraction | 1.46       | TRIM24          | 4BJ                          |
| 4YBS | X-ray diffraction | 1.83       | TRIM24          | 4BK                          |
| 4YBT | X-ray diffraction | 1.82       | TRIM24          | 4BV                          |
| 4YC9 | X-ray diffraction | 1.82       | TRIM24          | 4C1                          |
| 4ZQL | X-ray diffraction | 1.79       | TRIM24          | 4QH                          |
| 5H1T | X-ray diffraction | 1.95       | TRIM24          | 7FF                          |
| 5H1U | X-ray diffraction | 1.9        | TRIM24          | 6KT                          |
| 5H1V | X-ray diffraction | 2          | TRIM24          | 7FU                          |
| 3U5M | X-ray diffraction | 3.08       | TRIM33 $\alpha$ |                              |
| 3U5N | X-ray diffraction | 1.95       | TRIM33 $\alpha$ | H3(1-28)K9me3K14acK18acK23ac |
| 3U5O | X-ray diffraction | 2.7        | TRIM33 $\alpha$ | H3(1-22)K9me3K14acK18ac      |
| 3U5P | X-ray diffraction | 2.8        | TRIM33 $\alpha$ | H3(1-20)K9me3K14ac           |
| 5MR8 | X-ray diffraction | 1.74       | TRIM33 $\beta$  | H3K9ac                       |

|      |              |  |        |  |
|------|--------------|--|--------|--|
| 2RO1 | Solution NMR |  | TRIM28 |  |
|------|--------------|--|--------|--|

### 1.3 Comparison of the main contact regions of the KAc pocket

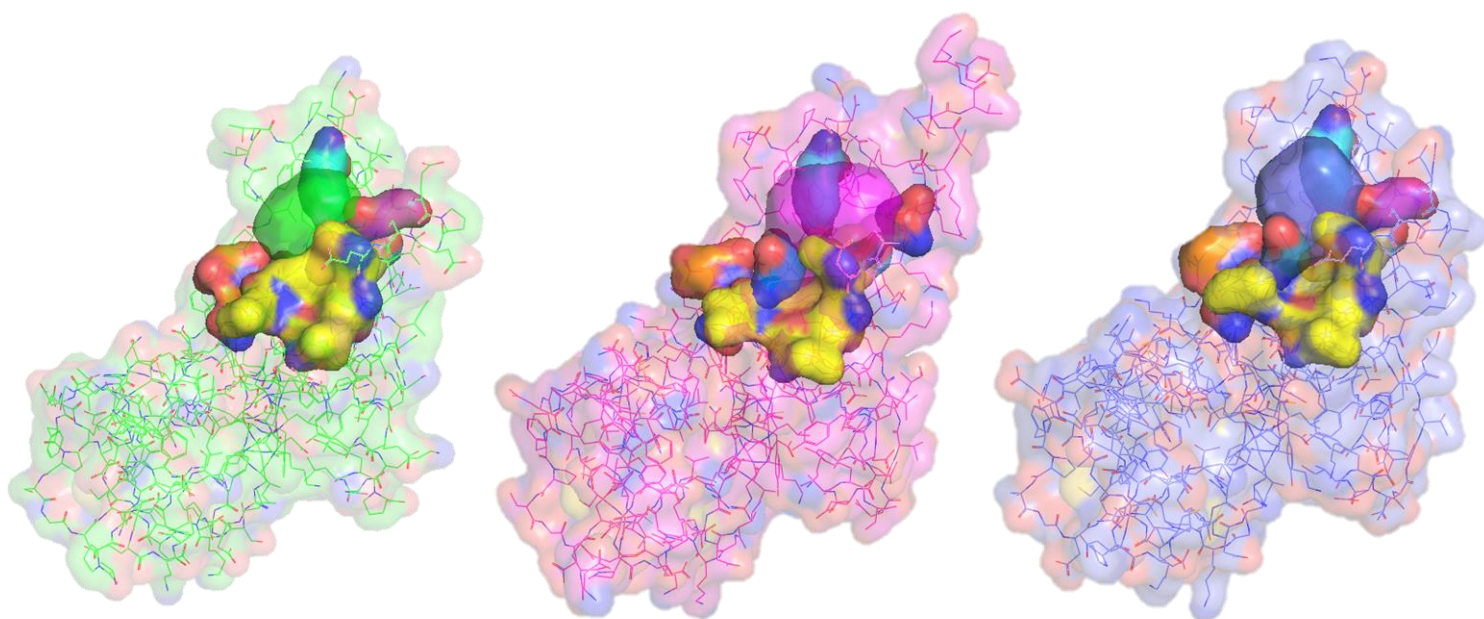

**Figure S1.** Analysis of the main hydrophobic (yellow surface) and hydrophilic (purple, orange and blue surfaces) contact regions of the KAc binding site in TRIM24 (green – PDB code: 4yc9[42]), TRIM33 $\alpha$  (magenta – PDB code: 3u5o[39]) and TRIM33 $\beta$  (violet – PDB code: 5mr8[36]).

### 1.4 Energetic scanning of residues

**Table S3.** Energetic evaluation of residues contribution to the TRIM24 KAc pocket MIFs.

| TRIM24 |       |        |        |         |         |
|--------|-------|--------|--------|---------|---------|
| Res    | Chain | Number | CRY    | O       | N1      |
| LEU    | A     | 922    | -10.51 |         | -169.15 |
| ALA    | A     | 923    | -77.70 | -6.63   | -625.91 |
| PHE    | A     | 924    | -34.17 | -13.31  | -9.47   |
| GLN    | A     | 925    | -1.69  |         |         |
| ASP    | A     | 926    | -33.03 | -61.37  | -148.82 |
| PRO    | A     | 927    | -3.76  |         | -129.02 |
| VAL    | A     | 928    | -85.92 | -129.30 | -23.58  |
| PRO    | A     | 929    | -65.73 | -4.94   | -9.76   |
| THR    | A     | 931    | -0.43  | -5.42   | -38.15  |
| VAL    | A     | 932    | -69.64 | -1.08   | -27.34  |
| PRO    | A     | 933    | -3.60  | -1.21   | -51.04  |

|     |   |     |         |         |         |
|-----|---|-----|---------|---------|---------|
| TYR | A | 935 | -30.45  | -201.67 | -80.78  |
| TYR | A | 936 | -1.33   | -24.64  | -11.88  |
| MET | A | 943 | -15.03  | -44.10  | -305.97 |
| ASP | A | 944 | -14.66  |         | -50.46  |
| ILE | A | 972 | -11.69  | -1.67   | -170.69 |
| ASN | A | 975 | -7.83   | -64.45  | -6.25   |
| CYS | A | 976 | -25.65  | -1.09   | -29.91  |
| PHE | A | 979 | -29.20  | -1.44   | -60.79  |
| ASN | A | 980 | -105.22 | -227.40 | -839.72 |
| GLU | A | 981 | -3.66   | -89.56  |         |
| SER | A | 984 | -6.49   | -69.38  | -77.95  |
| GLU | A | 985 | -5.27   | -2.87   | -23.57  |
| VAL | A | 986 | -64.97  | -58.09  | -18.02  |

**Table S4.** Energetic evaluation of residues contribution to the TRIM33 $\alpha$  KAc pocket MIFs.

| TRIM33 $\alpha$ |       |        |         |         |          |
|-----------------|-------|--------|---------|---------|----------|
| Res             | Chain | Number | CRY     | O       | N1       |
| ILE             | A     | 980    | -5.00   |         | -32.96   |
| GLU             | A     | 981    | -140.15 | -65.27  | -1171.92 |
| PHE             | A     | 982    | -27.11  | -12.27  | -6.98    |
| GLN             | A     | 983    | -1.50   |         |          |
| GLU             | A     | 984    | -1.48   | -14.74  | -54.22   |
| PRO             | A     | 985    | -4.53   | -2.26   | -8.45    |
| VAL             | A     | 986    | -56.59  | -104.62 | -6.95    |
| PRO             | A     | 987    | -4.15   |         | -1.06    |
| SER             | A     | 989    | -0.45   | -8.17   | -62.49   |
| ILE             | A     | 990    | -71.63  | -22.08  | -39.92   |
| PRO             | A     | 991    | -26.66  | -7.69   | -135.21  |
| ASN             | A     | 992    |         | -5.35   |          |
| TYR             | A     | 993    | -33.63  | -362.54 | -170.77  |
| TYR             | A     | 994    | -2.20   | -41.18  | -2.86    |
| MET             | A     | 1001   | -6.91   | -29.53  | -282.91  |
| ASP             | A     | 1002   | -22.59  |         | -145.93  |
| ILE             | A     | 1031   | -17.82  | -7.40   | -136.32  |
| ASN             | A     | 1034   | -11.69  | -54.18  | -1.15    |
| CYS             | A     | 1035   | -65.82  | -86.75  | -285.47  |
| GLU             | A     | 1036   | -1.11   |         | -14.29   |
| PHE             | A     | 1038   | -79.39  | -38.14  | -66.84   |
| ASN             | A     | 1039   | -80.27  | -72.57  | -503.23  |
| GLU             | A     | 1040   |         |         |          |
| MET             | A     | 1042   | -80.10  | -59.18  | -199.60  |
| LYS             | A     | 1043   | -14.95  | -19.95  |          |
| GLN             | A     | 1046   | -57.31  | -23.22  | -41.18   |
| SER             | A     | 1060   | -56.17  | -371.38 | -339.30  |
| GLU             | A     | 1061   | -62.58  | -8.10   | -614.18  |

|     |   |      |        |        |         |
|-----|---|------|--------|--------|---------|
| VAL | A | 1062 | -65.98 | -16.39 | -33.14  |
| ALA | A | 1063 | -8.951 | -4.34  | -14.452 |
| LYS | A | 1067 |        | -1.622 |         |

**Table S5.** Energetic evaluation of residues contribution to the TRIM33 $\beta$  KAc pocket MIFs.

| TRIM33 $\beta$ |       |        |                    |                  |                   |
|----------------|-------|--------|--------------------|------------------|-------------------|
| Res            | Chain | Number | CRY_max (kcal/mol) | O_max (Kcal/mol) | N1_max (kcal/mol) |
| ILE            | A     | 980    | -2.01              | -1.14            | -135.06           |
| GLU            | A     | 981    | -165.22            | -70.23           | -1388.19          |
| PHE            | A     | 982    | -33.31             | -19.15           | -6.99             |
| GLN            | A     | 983    | -0.38              |                  |                   |
| GLU            | A     | 984    | -19.24             | -69.07           | -61.83            |
| PRO            | A     | 985    | -2.75              | -2.69            | -97.22            |
| VAL            | A     | 986    | -63.33             | -114.49          | -11.06            |
| PRO            | A     | 987    | -22.84             | -7.45            |                   |
| SER            | A     | 989    | -0.28              | -4.36            | -21.17            |
| ILE            | A     | 990    | -78.20             | -26.11           | -20.58            |
| PRO            | A     | 991    | -4.07              | -1.03            | -68.60            |
| TYR            | A     | 993    | -22.19             | -256.96          | -83.95            |
| TYR            | A     | 994    | -1.66              | -13.72           |                   |
| MET            | A     | 1001   | -13.85             | -64.28           | -290.17           |
| ASP            | A     | 1002   | -22.17             | -1.84            | -96.93            |
| ILE            | A     | 1031   | -12.81             | -3.53            | -168.77           |
| ASN            | A     | 1034   | -6.56              | -40.47           | -3.55             |
| CYS            | A     | 1035   | -27.98             |                  | -27.67            |
| PHE            | A     | 1038   | -27.13             | -12.94           | -67.81            |
| ASN            | A     | 1039   | -101.72            | -265.87          | -802.33           |
| GLU            | A     | 1040   | -28.20             | -112.00          | -77.80            |
| SER            | A     | 1043   | -7.25              | -74.49           | -64.86            |
| GLU            | A     | 1044   | -12.56             | -8.31            | -10.11            |
| VAL            | A     | 1045   | -46.72             | -109.72          | -28.72            |

### 1.5 Consideration about the X-ray conserved water molecule

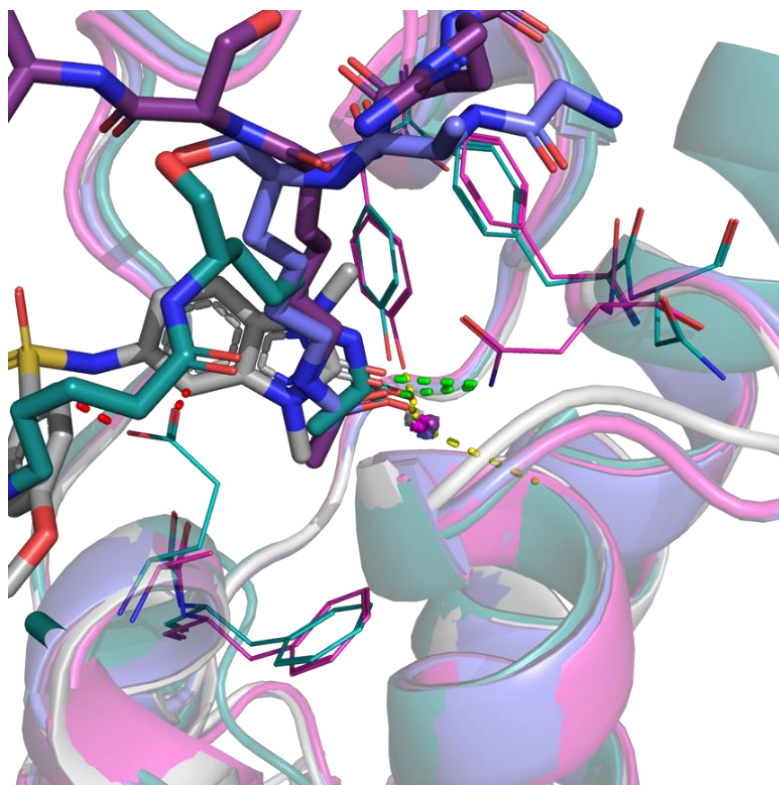

**Figure S2.** Structural comparison of TRIM24 and TRIM33 $\alpha$ . TRIM24 in its free-ligand state (PDB code: 3o33[57] in magenta) and TRIM24 in complex with: ligand 4A8 (PDB code: 4yat[42] in grey), H3(23-31)K27ac peptide (PDB code: 3o35[57] in violet) and H4(14-19)K16ac peptide (PDB code: 3o36[57] in purple). TRIM33 $\alpha$  in complex with H3(1-20)K9me3K14ac peptide (PDB code; 3u5p[39] in teal). The X-ray Ligand 4A8 and the other 3 peptides reported have a similar binding mode, in particular the position of the carbonyl group is always the same (suggesting that also the interaction with the protein is the same). One of these peptides is co-crystallized with TRIM33 $\alpha$  (coloured in teal) and also that one conserved the binding mode despite the different orientation of the Asparagine residue. Observing the majority of the known TRIM24 structures (both Apo and Holo), there is always a conserved and structural water molecule in the bottom of the pocket (close to the asparagine residue).



### 1.6 Docking in TRIM33 $\alpha$ without the conserved water molecule

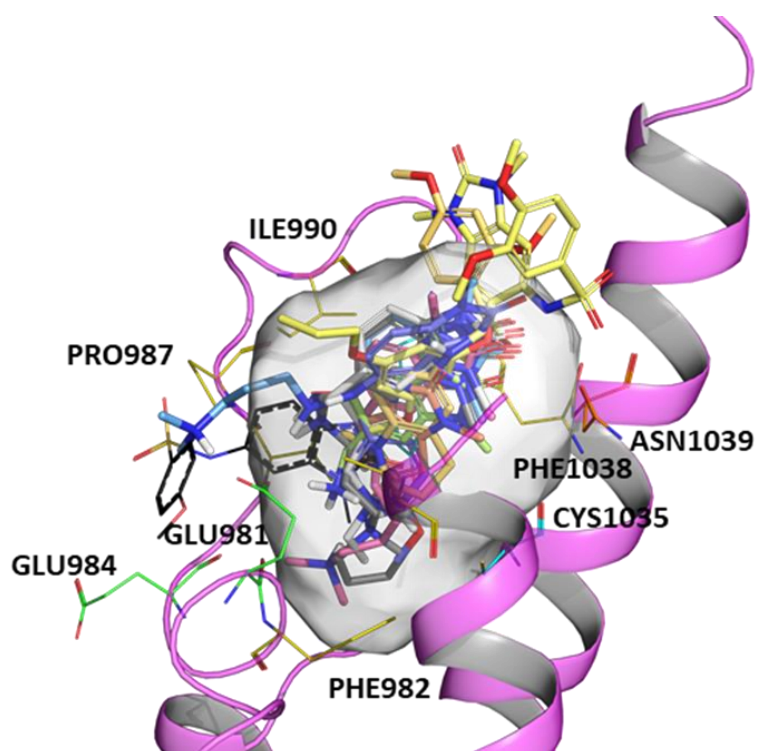

**Figure S3.** The obtained wrong docking poses in BRD of TRIM33 $\alpha$  (PDB code: 3u5o[39], represented in magenta) using GLIDE without water constraint are reported. Reference X-ray ligand 4A8 (compound 3) for its binding mode (represented as black wire). The main interacting pocket residues are highlighted: lipophilic residue as yellow wires, ASN1039 as orange wires, TYR993 and CYS1035 as cyan wires and GLU981 and GLU984 as green wires. Compounds 2, 3, 4, 5, 6, 7, 8, 9 and 10 are represented as sticks in multiple colours.

## 1.7 Docking in TRIM33 $\beta$

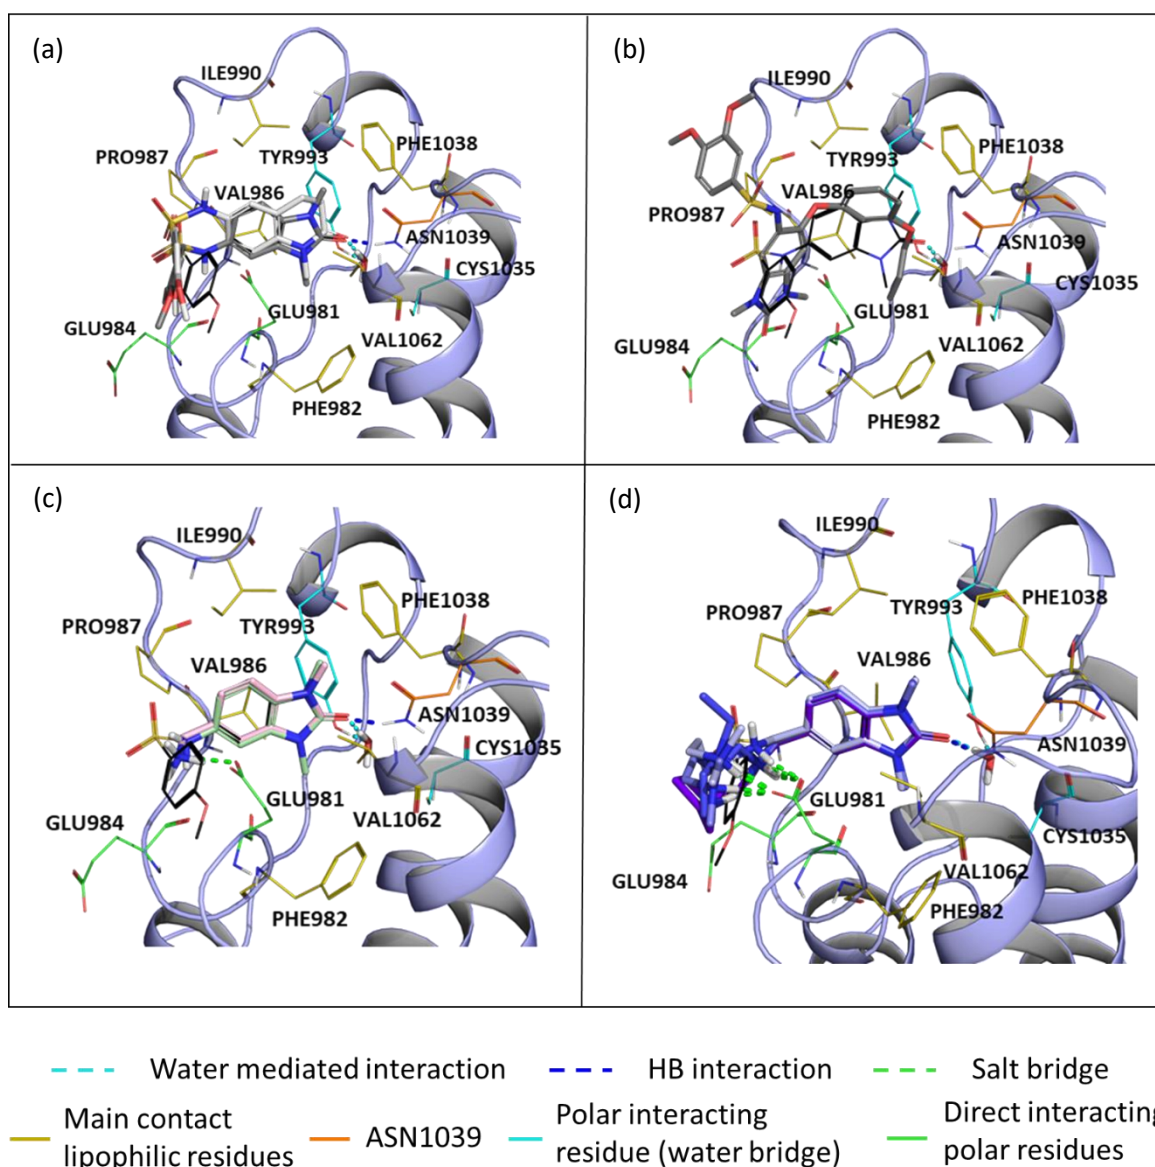

**Figure S4.** The obtained docking poses in BRD of TRIM33 $\beta$  (PDB code: 5mr8[36], represented in purple) using GLIDE are reported. Reference X-ray 4A8 ligand for its binding mode (represented as black wire). The main interacting pocket residues are highlighted: lipophilic residue as yellow wires, ASN1039 as orange wires, TYR993 and CYS1035 as cyan wires and GLU981 and GLU984 as green wires. Moreover, the water mediated interaction as represented in cyan, the direct HB interaction in blue and the salt bridge interactions in green. (a) Representation of compounds 2 (as light grey stick) and 3 (as grey stick). (b) Representation of compound 4 (as dark grey stick). (c) Representation of scaffold 5 (as pale green stick) and 6 (as light pink stick). (d) Representation of compound 7 (as light blue stick), 8 (as tv blue stick), 9 (as slate stick) and 10 (as purple stick) in their first possible conformation.

### 1.8 Comparison between the canonical BRD of TRIM24 and the not-canonical BRD of TRIM28

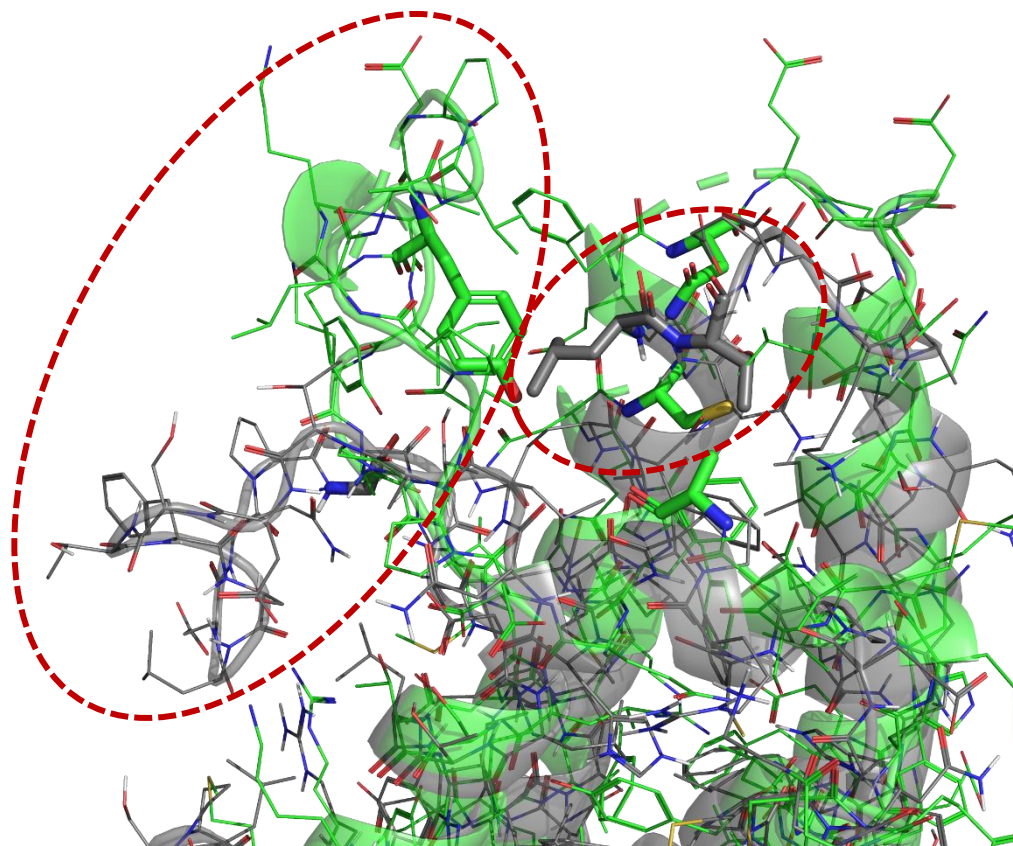

**Figure S5.** Overlap of TRIM24 structure in green (PDB code: 4yat[42]) and aligned TRIM28 structure in grey (PDB code: 2ro1[60]). The main residues of the KAc binding site of the BRD domain are represented as sticks to highlight the main differences and the different site conformation.

## 1.9 $K_d$ determination of the Peptide/TRIM systems

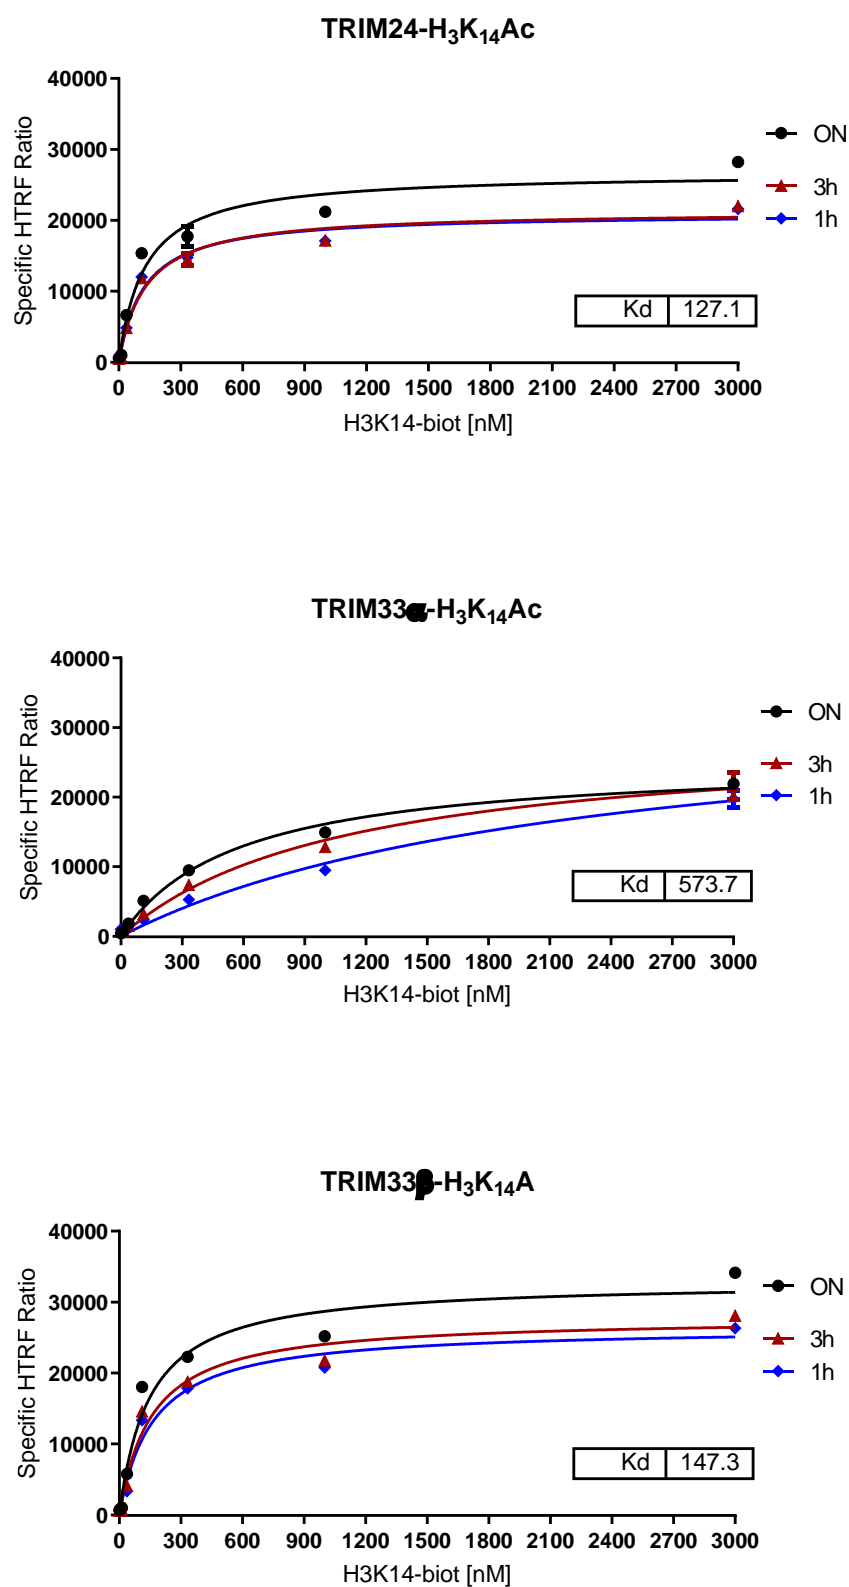

**Figure S6.** HTRF assay – titration curves for  $K_d$  determination of Biotinylated Histone H<sub>3</sub>K<sub>14</sub>Ac peptide with TRIM24, TRIM33 $\alpha$  and TRIM33 $\beta$ .

### 1.10 Possible chain conformations from docking analysis

In the obtained X-ray crystallographic complexes of TRIM33 $\alpha$  and compounds 8, 9 and 10 the density map of the chain was not detected due to the not optimal resolution of the structures and its high degree of movement. In fact, the chain is highly exposed to the solvent and as highlighted also by the docking analysis, for each compound several poses were obtained, with comparable docking score, just differentiated by the position of the chain. This is free to move and rotate and may interact both with the GLU981 and GLU984. Just the position of this chain can also influence the position of some flexible residues close to the binding site. The docking analysis was performed using standard parameters imposing the interaction with the crystallographic water stored in the input receptor and without any optimization step. However, considering the different conformers obtained and the possible influence of the different chain positions on the flexible residues of the protein, the obtained docking poses were post processed using the Refine Protein-Ligand Complex tool in Maestro. This is a refinement step performed in order to relax the complex and to minimise the interactions and the relative atoms positions. It is evident that the chain is actually free to move by folding and interacting with a double anchor on GLU981 or to extend and interact with GLU984 and GLU983 on the backbone. Precisely for this reason and considering the non-optimal resolutions of the structures obtained, the position of the chain is not defined and the chain was deleted from the deposited PDB structures of TRIM33 $\alpha$ .

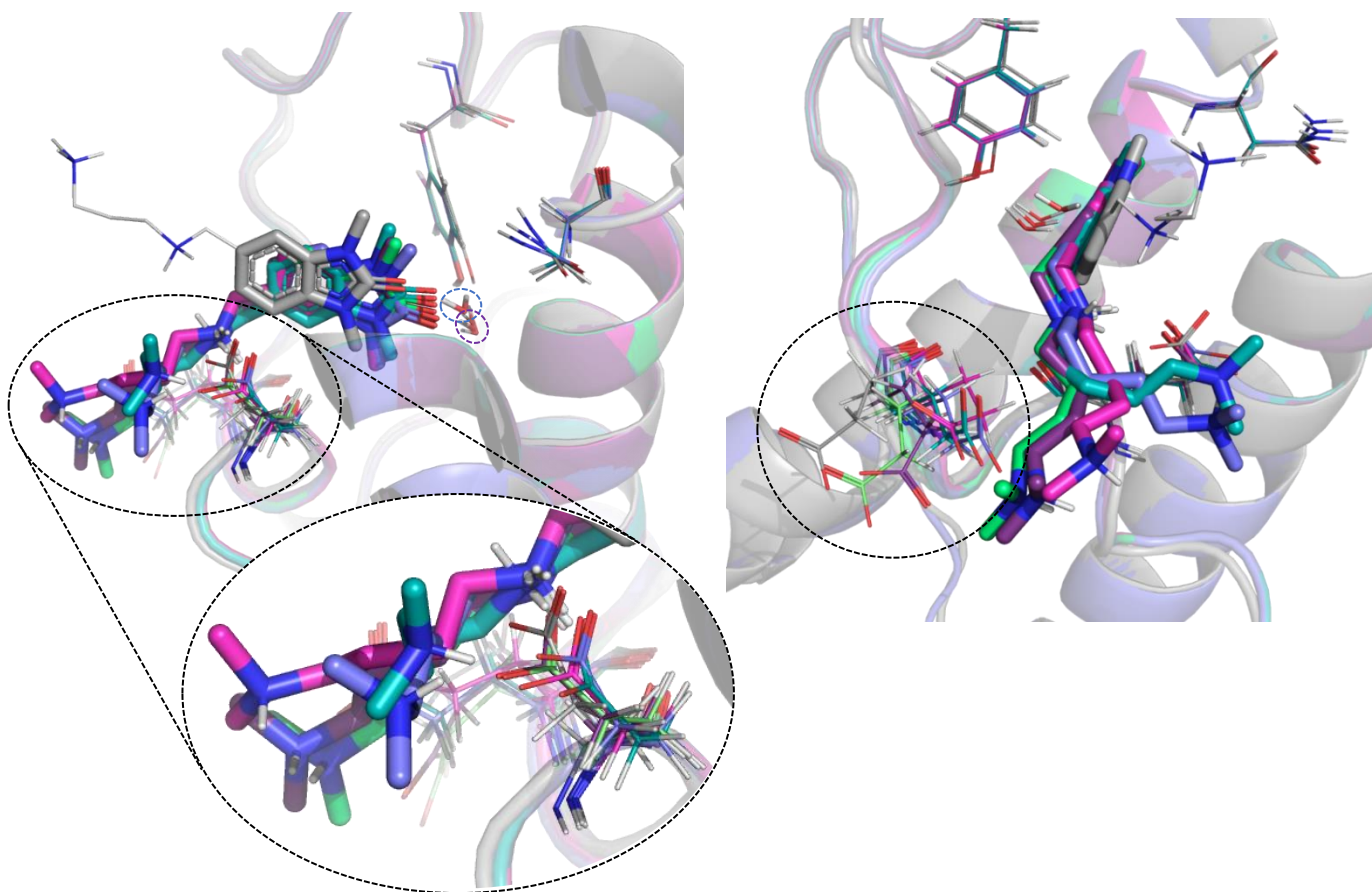

**Figure S7.** Obtained X-ray structure of TRIM33 $\alpha$  co-crystallized with compound 8 (in grey) and its obtained docking poses (multi-colours – PDB code: 3u5o[39] as input receptor for the analysis) are represented. The resolved scaffold and docked ligands are represented as sticks while the crystallographic ligand chain (unsolved) is represented as wire. X-ray conserved water is well defined and highlighted by the light blue circle, while the water molecule used in the docking analysis is shown by the purple circle. Moreover, the boxes show how the various conformation of the chain, in the different docking poses, influences the position of the residues involved in the interactions.



### 1.11 TRIM33 $\alpha$ ligands: Experimental binding mode vs Predicted pose

In Figure below, the comparison between the predicted and the experimental binding mode is reported. The obtained X-ray crystallographic structures of TRIM33 $\alpha$  in complex with ligands 8, 9 and 10 confirm both the binding of the ligands into the KAc region and the predicted binding mode. The X-ray scaffolds of ligands 8, 9 and 10 are overlapped with the docking pose previously reported. Moreover, also the conserved water molecule is detected in the X-ray structure validating the water considerations made and its key role in the binding to TRIM33 $\alpha$ . Focusing on the scaffold of the ligands, there is a little shift of the x-ray structure, particularly with ligand 8 (Figure 8a). However, the water mediated network between the carbonyl group of the ligands and the TYR993 and CYS1035 is still conserved both in terms of interaction made and also in terms of bond distances between the parts (Lig-Wat from 3.0 Å to 3.2 Å, THR993-Wat from 2.5 Å to 2.7 Å and CYS1035-Wat from 3.1 Å to 3.3 Å). In fact, the water molecule and the pocket residues are also shifted and the geometry of the interactions is always preserved.

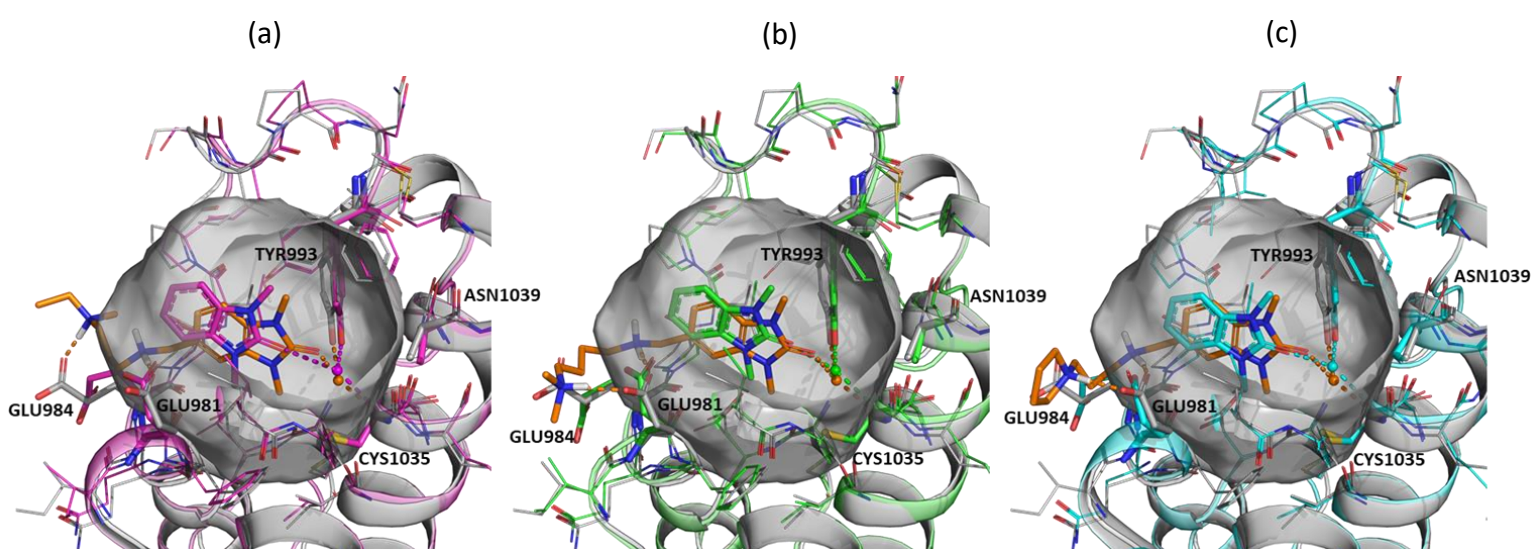

**Figure S8.** Overlap between the predicted docking poses (PDB code: 3u5o[39] in grey) and the obtained X-ray crystallographic structures (TRIM33 protein and residues coloured according to the ligand). KAc binding site view of TRIM33 $\alpha$  PHD-BRD with (a) 8 (in sticks, X-ray pose in magenta and docking pose in orange), (b) 9 (in sticks, X-ray pose in green and docking pose in orange), (c) 10 (in stick, X-ray pose in cyan and docking pose in orange). Water X-ray molecules and the one used in the docking are displayed as spheres coloured according with the related ligand. Hydrogen bonds are represented as dashed lines coloured according with the related ligand. Oxygen and nitrogen atoms are coloured red and blue, respectively.

## Experimental section

### 2.1 HTRF assay

#### HTRF reagents

EPIgeneous™ Binding Domain Discovery Kit: all reagents were obtained from PerkinElmer | cisbio (Codolet, FR)

- Binding Domain Diluent Buffer (Diluent - catalog number 62DLBDDF)
- Binding Domain Detection Buffer #1 (Buffer1 - catalog number 62DB1FDG)
- Binding Domain Detection Buffer #2 (Buffer2 - catalog number 62DB2FDG)
- Streptavidin-d2 Reagent (S-D2 - catalog number 610SADLA)
- Streptavidin-XL665 Reagent (S-XL665 - catalog number 610SAXLA)
- Anti GST-Eu Cryptate Antibody ( $\alpha$ GST Eu - catalog number 61GSTKLA)
- Anti GST-Tb Cryptate Antibody ( $\alpha$ GST Tb - catalog number 61GSTTLA)

HTRF® detection reagents were resuspended and stored according to manufacturer's recommendations.

#### Proteins, peptides and ligands:

- Human recombinant TRIM24 bromodomain (residues 824-1014) expressed as an N-terminal GST-TEV-fusion protein in E. coli (Reaction Biology corp., Malvern, USA; catalog number RD-11-186)
- Human recombinant TRIM33 $\alpha$  PHD-bromodomain (residues 885-1091) expressed as an N-terminal GST-fusion protein in E. coli (Reaction Biology corp., Malvern, USA; catalog number RD-11-238)
- Human recombinant TRIM33 $\beta$  bromodomain construct (residues 885-1074) expressed as an N-terminal GST-fusion protein in E. coli (Reaction Biology corp., Malvern, USA; catalog number RD-11-290)

The proteins were initially stored at -80 °C in 1  $\mu$ L aliquots. When necessary, to the aliquots were added the volume of Binding Domain Diluent Buffer suitable to reach the desired concentration for the assay.

- Histone H<sub>3</sub>K<sub>23</sub>Ac peptide, Biotinylated (Creative Biomart Epigenetics, Milan, IT; catalog number SP-0367)
- Histone H<sub>4</sub>K<sub>5,8,12,16</sub>Ac peptide, Biotinylated (Creative Biomart Epigenetics, Milan, IT; catalog number SP-0238)
- Histone H<sub>3</sub>K<sub>14</sub>Ac peptide, Biotinylated (Creative Biomart Epigenetics, Milan, IT; catalog number SP-0367).

All peptides were initially suspended into Binding Domain Diluent Buffer to obtained stock solution at concentration 350  $\mu$ M and stored at -20 °C in 1  $\mu$ L aliquots. When necessary, to the aliquots were added the volume of Binding Domain Diluent Buffer suitable to reach the desired concentration for the assay.

- Two of the tested ligands (4A7 and 4A8) were acquired (Mcule, Hungary) while the others were synthesized by the research group (See Chemistry section below)

All compounds were initially dissolved into DMSO and stored at -20 °C in 1  $\mu$ L aliquots. When necessary, to the aliquots were added the volume of Binding Domain Diluent Buffer suitable to reach the desired concentration for the assay.

**Filter set:**

The reader must be appropriately configured for HTRF readout by setting up the measurement conditions in the Gen5 Reader Control and data Analysis Software (see Table below). HTRF assay must be read using the filter-based detection mode only.

| Settings              | Filter set 1                         | Filter set 2 |
|-----------------------|--------------------------------------|--------------|
| Excitation wavelength | 330/80                               | 330/80       |
| Emission wavelength   | 620/10                               | 665/10       |
| Dichroic mirror       | 365                                  | 365          |
| Gain                  | Autoscale                            |              |
| Read speed            | Normal                               |              |
|                       | Delay after plate movement: 100 msec |              |
|                       | Measurement per data point: 10       |              |
|                       | Lamp energy: High (more sensitivity) |              |
| Time resolved         | Delay time: 150 $\mu$ sec            |              |
|                       | Data collection time: 500 $\mu$ sec  |              |

**Kit and peptide selection procedure:**

In order to identify the optimal peptide and optimal kit for each TRIM, a preliminary HTRF binding assay was performed using for each TRIM all the three bought peptides in combination with three different EPIgeneous™ Binding Domanin Discovery Kit (Kit-A, Kit-B, Kit-C). All Kits comprise the same Diluent but differ for the combination of the other components:

- Kit-A: Anti GST-Eu Cryptate Antibody & Streptavidin-d2 Reagent (Buffer1)
- Kit-B: Anti GST-Eu Cryptate Antibody & Streptavidin-XL665 Reagent (Buffer1)
- Kit-C: Anti GST-Tb Cryptate Antibody & Streptavidin-XL665 Reagent (Buffer2)

HTRF assays were performed in white 384 Well Small Volume™ HiBase Polystyrene Microplates (Greiner) with a total working volume of 20  $\mu$ L. TRIMs aliquots were diluted in Diluent to get a 25 nM working solutions (5X, the final concentration in the total well volume, 20  $\mu$ L, should be 5 nM) and 4  $\mu$ L were dispensed in each well. Similarly, the peptides aliquots were suitably diluted in Diluent to get 15  $\mu$ M working solutions (5X, the final concentration in the total well volume, 20  $\mu$ L, should be 3  $\mu$ M) and 4  $\mu$ L were dispensed in each well. Then, the Streptavidin was diluted in the opportune Buffer, 1 or 2 according to the kit indications, to get 1500 nM working solutions (4X, the final concentration in the total well volume, 20  $\mu$ L, should be 0,375  $\mu$ M, 1/8 of the Peptide concentration) and 5  $\mu$ L were dispensed in each well. Finally, the  $\alpha$ GST aliquots (50X) were diluted 50-fold in appropriate buffer, 1 or 2 according to the kit indications, to get the working solution and 5  $\mu$ L were dispensed in each well.

The GST protein is missing in the control wells and, in substitution, 4  $\mu$ L of Diluent (in which the protein is dissolved) were added to reach the overall assay volume. Each measurement was performed in triplicate.

To explore the stability and reliability of HTRF assay, repeated tests for each kit were performed and the Z' value was calculated. The Z'-factor is often used as a performance indicator for which an excess of 0.5 indicates high assay performance.



### Peptide titration procedure:

TRIMs concentration is fixed at 5 nM final concentration (see previously section). Peptide stock solutions was diluted by Diluent Buffer to prepare the 5X working solutions (5X, the final max concentration in the total well volume, 20 µL, should be 3 µM) and then underwent six serial three-fold dilutions. The tested range of peptide concentration was from 3000 nM to 4 nM. As the biotin/streptavidin molar ratio must be 8/1 during the detection step, Streptavidin was diluted in the opportune Buffer 1 or 2 according to the supplier indications, to get 4X working solutions (4X, the final max concentration in the total well volume, 20 µL, should be 0,375 µM) and then serially diluted 1:3. Finally, the αGST aliquots (50X) were diluted 50-fold in the appropriate buffer, 1 or 2 according to the kit indications, to get the working solution and 5 µL were dispensed in each well.

For each peptide-biotin concentration a negative control is performed by not adding the GST protein to the wells, replacing it with the same volume of Diluent. Each measurement was performed in triplicate.

### Competition binding procedure:

The best assay conditions were determined in the previous steps (kit and peptide identification and peptide-titration). TRIM concentration was fixed at 5 nM final concentration (see Kit and peptide selection procedure section). The compound stock solutions were diluted in Diluent to get 200 µM working solution (10X, the final max concentration in the total well volume, 20 µL, should be 20 µM) and then serially diluted 1:2. The tested range of compound concentration was from 20 µM to 2.5 µM. Peptide concentration was fixed for each TRIM at the relative K<sub>d</sub> value previously determined, in order to compare different systems (the peptide in fact has different affinities for the TRIMs, but with a peptide concentration equal to K<sub>d</sub>, regardless of the affinities, only half of the TRIMs will be occupied at equilibrium). Peptides stock solutions were diluted in Diluent Buffer to get a 5X working solution depending on the final optimal concentration (K<sub>d</sub> concentration). Streptavidin and αGST were prepared as reported in the peptide titration procedure. In addition to the usual negative control, a positive control, in which there are all the reagents except the compound, was added.

### HTRF data analysis:

- As regards the Kit and peptide selection and the peptide titration, the data analysis is the same:
  - Per each well (both positive signal and negative controls) the ratio between the fluorescence intensities were calculated:

$$\text{Ratio}_i = \frac{\text{Fluorescence Intensity } 665 \text{ nM}_i}{\text{Fluorescence Intensity } 620 \text{ nM}_i} \times 10000^*$$

\*The 10<sup>4</sup> multiplying factor is introduced for easier the data processing

- The triplicate ratios were averaged:

$$\text{Ratio}_i = \frac{\text{Ratio}_{i,1} + \text{Ratio}_{i,2} + \text{Ratio}_{i,3}}{3}$$

- Comparing each mean ratio of the positive signal wells with the control ones, the S/B ratio is determined:

$$\text{S/B (\%)} = \frac{\text{Ratio (Positive signal)}_i}{\text{Ratio (Negative control)}} \times 100$$

- Z' calculation needs four variables: the average signal of the positive controls; the average signal of the negative controls; the standard deviation of the positive controls; the standard deviation of the low controls. The value is calculated as follows:

$$Z' = 1 - \frac{(3SD_+ + 3SD_-)}{|AVE_+ - AVE_-|}$$

- As regards the competition binding assay, the data analysis involves additional steps. In order to compare different experiments (for example the same compound in different TRIMs or multiple compounds in the same TRIM), since these are not perfectly reproducible, it is necessary to normalise the data. After calculating the ratio (665/620), to reduce the variability between wells and reduce the interference effect of each possible compound to the fluorescence measurement, the data are normalised for  $\Delta F$ :

- The ratio must be calculated for each well individually. The mean and standard deviation can then be worked out from replicates.

$$\text{Ratio}_i = \frac{\text{Fluorescence Intensity } 665 \text{ nM}_i}{\text{Fluorescence Intensity } 620 \text{ nM}_i} \times 10000^*$$

\*The  $10^4$  multiplying factor is introduced for easier the data processing

- $\Delta F$  is used for the comparison of day-to-day runs of the same assay. It reflects the signal to background of the assay. The negative control plays the role of an internal assay control.

$$\Delta F = \frac{\text{Ratio}_i - \text{Ratio}(\text{Negative controls})}{\text{Ratio}(\text{Negative controls})} \% \rightarrow \frac{\text{SIGNAL} - \text{BACKGROUND}}{\text{BACKGROUND}}$$

- To compare different competitive assays, the data are normalized using the  $\Delta F_{\max}$

$$\frac{\Delta F_i}{\Delta F_{\max}} \% \rightarrow \Delta F_{\max} = \frac{\text{Ratio}(\text{Positive control}) - \text{Ratio}(\text{Negative controls})}{\text{Ratio}(\text{Negative controls})} \%$$

Delta F max corresponds to 100% of the HTRF signal. This occurs when the compound is not present in solution and the fluorescence transfer is maximum due to the bind between peptide and protein. In presence of the compound, if this competes with the peptide for binding to the protein, the detected signal will be lower because the fluorescence transferred from the donor ( $\alpha$ GST – bind to the protein) to the acceptor (Streptavidin - bind to the peptide) will be lower. To explore the stability and reliability of high-throughput screening based on the HTRF assay, repeated tests were performed at a single concentration of antibody reagents. Then the Z value and the S/B value were calculated ( $Z = 1 - (3 * (\sigma_p + \sigma_n) / (\mu_p - \mu_n))$ )

Data manipulation and calculations were performed with Microsoft Excel. All curve-fitting operations were performed using GraphPad Prism Version 8.4.3. The saturation binding experiments to determine the Kd value of each TRIM-peptide system were analysed by curve fitting using the 1-site specific binding function.

## 2.2 Chemistry

### General Synthetic Chemistry Methods

Unless otherwise noted, starting materials, reagents, and solvents were purchased from commercial suppliers and were used as received without further purification.

Reactions were routinely monitored by thin-layer chromatography (TLC) performed on silica gel 60 F254 (layer 0.2 mm) pre-coated aluminium foil (with fluorescent indicator UV254) (Sigma-Aldrich). Developed plates were air-dried and visualized by UV detector ( $\lambda$ : 254/365 nm) and/or by staining and warming with potassium permanganate or ninhydrin. Flash column chromatography was performed on Merck silica gel 60 (mesh 230-400). Automated flash chromatographic purifications were performed using Biotage® Selekt (Cartridge: Sfar Silica HC Duo 5g or 10g).  $^1\text{H}$  NMR and  $^{13}\text{C}$  NMR spectra were recorded at room temperature at 400 and 101 MHz, respectively, on a Bruker Avance 400 spectrometer in the indicated solvent by using residual solvent peak as internal standard. Chemical shifts are reported in ppm ( $\delta$ ) and the coupling constants ( $J$ ) are given in Hertz (Hz). Peak multiplicities are abbreviated as follows: s (singlet), bs (broad singlet), d (doublet), dd (double doublet), t (triplet), dt (double triplet), q (quartet), p (pentet), and m (multiplet). High-Resolution Mass Spectroscopy (HRMS) analyses were carried out on Agilent Technologies 6540 UHD Accurate Mass Q-TOF LC-MS system. The purity of all synthesized compounds was confirmed to be >95% by UPLC-MS. The analyses were carried out according to the method listed below. The mobile phase was a mixture of water (solvent A) and acetonitrile (solvent B), both containing formic acid at 0.1%. Method: Phenomenex Luna Omega C18 Polar, 1.6  $\mu\text{m}$  (C18, 100 x 2.1 mm) column at 40° C using a flow rate of 0.65 mL/min in a 10 min gradient elution. Gradient elution was as follows: 99.5:0.5 (A/B) to 5:95 (A/B) over 8 min, 5:95 (A/B) for 2 min, and then reversion back to 99.5:0.5 (A/B) over 0.1 min. The UV detection is an averaged signal from a wavelength of 190 nm to 640 nm and mass spectra are recorded on a mass spectrometer using positive mode electro spray ionization.

Compounds 1,3-dimethyl-2-oxo-2,3-dihydro-1*H*-benzo[d]imidazole-5-carbaldehyde, 3,4-diaminobenzonitrile, 5-nitro-1*H*-benzo[d]imidazol-2(3*H*)-one and resorcinol were purchased from Fluorochem.

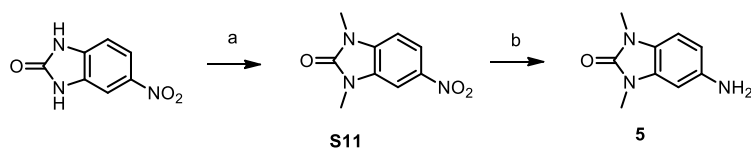

*Reagents and conditions:* (a) i. 60% NaH, dry DMF, 0 °C-rt, 30 min; ii.  $\text{CH}_3\text{I}$ , dry DMF, rt, 30 min; b) Pd/C,  $\text{P}_{\text{H}_2}$  = 1 bar, dry THF:EtOH mixture (1:1), rt, 5 h.

### 1,3-Dimethyl-5-nitro-1*H*-benzo[d]imidazol-2(3*H*)-one (S11).[61]

Under  $\text{N}_2$  atmosphere, the solution of 5-nitro-1*H*-benzo[d]imidazol-2(3*H*)-one (2.0 g, 11.165 mmol) in dry DMF (12.0 mL) was added to a suspension of NaH 60% (0.937 g, 23.447 mmol) in dry DMF (5.0 mL) and the mixture was stirred at 0° C for 30 minutes. Thus, iodomethane (5.547 g, 39.078 mmol) was added dropwise and the reaction mixture stirred at room temperature for 30 min. The reaction mixture was quenched with EA (10 mL) yielding a precipitate which was filtered and washed with  $\text{H}_2\text{O}$  (10 mL x 3) and then DEE (10 mL x 3). The organic phase recovered from the previous filtration process, added of  $\text{H}_2\text{O}$  (30 mL) and acidified with HCl 2N, was subsequently extracted with EA (10 mL x 5). The reunited organic phases were washed with brine (10 mL x 2), dried over  $\text{Na}_2\text{SO}_4$ , and then evaporated via rotary evaporation. The solids obtained by both filtration and extraction processes were collected together and dried by vacuum to obtain S11 as a yellow solid (2.2 g, 90% yield).  $^1\text{H}$  NMR (400 MHz,  $\text{CDCl}_3$ )  $\delta$  8.12 (dd,  $J$  = 8.6, 2.2 Hz, 1H), 7.89 (d,  $J$  = 2.2 Hz, 1H), 7.02 (d,  $J$  = 8.7 Hz, 1H), 3.50 (s, 3H), 3.49 (s, 3H).

### 5-Amino-1,3-dimethyl-1H-benzo[d]imidazol-2(3H)-one (5).[61]

Under N<sub>2</sub> atmosphere, to the solution of **S11** (2.07g, 10 mmol) in a mixture of THF dry/EtOH dry 2:1 (105 mL) Pd/C 10 % (0.207g) was added and the mixture was stirred at room temperature under H<sub>2</sub> (1 bar) atmosphere for 5 h. Then, the reaction mixture was filtered over a pad of Celite, washed with THF (5.0 mL x 3) and evaporated via rotary evaporation obtaining **5** as a yellow solid (1.760 g, 99% Yield) and used without further purifications. <sup>1</sup>H NMR (400 MHz, DMSO-*d*<sub>6</sub>) δ 6.79 (d, *J* = 8.2 Hz, 1H), 6.36 (d, *J* = 2.0 Hz, 1H), 6.31 (dd, *J* = 8.2, 2.1 Hz, 1H), 4.79 (bs, 2H), 3.22 (s, 3H), 3.21 (s, 3H). <sup>13</sup>C NMR (101 MHz, DMSO-*d*<sub>6</sub>) δ 154.32, 144.31, 130.97, 121.21, 108.43, 107.36, 94.85, 27.26, 27.14. HRMS (ESI) *m/z* [M + H]<sup>+</sup> calcd for C<sub>9</sub>H<sub>11</sub>N<sub>3</sub>O 178.09804, found 178.09750. UPLC retention time: 1.176 min.

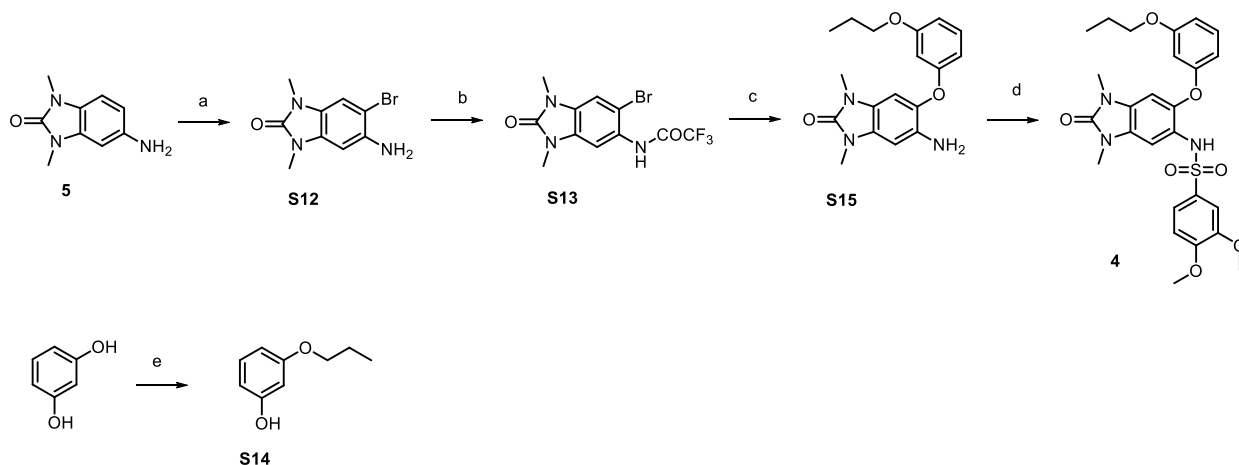

*Reagents and conditions:* (a) Br<sub>2</sub>, AcOH, DCM, 0 °C-rt, 45 min; (b) Trifluoroacetic Anhydride, Et<sub>3</sub>N, DMAP, DCM, 0 °C-rt, 5 h; (c) appropriated phenol intermediates (**S14**), CuI, Cs<sub>2</sub>CO<sub>3</sub>, *N,N*-dimethylglycine, dry dioxane, 80°C, overnight; (d) 3,4-dimethoxybenzene-1-sulfonyl chloride, dry Pyr, dry DCM, 2-3 h; (e) K<sub>2</sub>CO<sub>3</sub>, DMF, 70°C, overnight.

### 5-Amino-6-bromo-1,3-dimethyl-1H-benzo[d]imidazole-2(3H)-one (**S12**).[42]

To a solution of **5** (0.429 g, 2.421 mmol) in DCM/AcOH 1:1 (24 mL) at 0°C Br<sub>2</sub> (0.387 g, 2.421 mmol) was added carefully dropwise. After stirring at room temperature for 45 minutes, the reaction mixture was diluted with H<sub>2</sub>O (100 mL), neutralized with NaHCO<sub>3</sub> aq. sat. (150 mL), and extracted with DCM (50 mL x 5). The reunited organic phases were washed with H<sub>2</sub>O (40 mL x 3), brine (20 mL x 2), dried over Na<sub>2</sub>SO<sub>4</sub> and evaporated to dryness. The crude was then purified by flash column chromatography on SiO<sub>2</sub> (EA 100%), obtaining **S12** as a yellow solid (0.450 g, 73 % Yield). <sup>1</sup>H NMR (400 MHz, CDCl<sub>3</sub>) δ 7.01 (s, 1H), 6.48 (s, 1H), 3.34 (s, 3H), 3.33 (s, 3H). <sup>13</sup>C NMR (101 MHz, CDCl<sub>3</sub>) δ 154.58, 138.82, 130.72, 123.78, 110.99, 101.35, 95.68, 27.24, 27.17.

### *N*-(6-Bromo-1,3-dimethyl-2-oxo-2,3-dihydro-1H-benzo[d]imidazol-5-yl)-2,2,2-trifluoroacetamide (**S13**).[42]

At 0°C to a solution of **S12** (2.0 g, 7.809 mmol) in DCM (125 mL) DMAP (0.095g, 0.781 mmol), Et<sub>3</sub>N (1.581 g, 15.619 mmol), and then dropwise and with vigorous stirring trifluoroacetic anhydride (2.460 g, 11.714 mmol) were added and the reaction mixture was stirred for 2 h by warming up gradually to room temperature. The mixture was quenched with H<sub>2</sub>O (20 mL), washed with brine (15 mL x 2), dried over Na<sub>2</sub>SO<sub>4</sub> and evaporated to dryness, yielding **S13** as a yellow solid (0.655g, 95 % Yield) after a purification via flash chromatography on SiO<sub>2</sub> (EA, 100%) <sup>1</sup>H NMR (400 MHz, CDCl<sub>3</sub>) δ 8.43 (s, 1H), 7.99 (s, 1H), 7.17 (s, 1H), 3.42 (s, 3H), 3.40 (s, 3H).

### 5-Amino-1,3-dimethyl-6-(3-propoxyphenoxy)-1H-benzo[d]imidazol-2(3H)-one (**S15**).[42]

Under N<sub>2</sub>, to the solution of the phenol intermediate **S14** (1.29 g, 8.52 mmol) in dry dioxane (42 mL) **S13** (2.0 g, 5.68 mmol), Cs<sub>2</sub>CO<sub>3</sub> (5.74 g, 17.61 mmol), CuI (0.325 g, 1.704 mmol), and *N,N*-dimethylglycine (0.586 g, 5.68 mmol) were added and the mixture was stirred at 80°C for 8 h. After TLC showed partial consumption of the starting materials was added dry MeOH (21 mL) (to facilitate the deprotection of the trifluoroacetamide intermediate) and the mixture further stirred at 80°C overnight. The solvent was evaporated to dryness and the crude was purified by flash column chromatography on SiO<sub>2</sub> (EA, 100%). The titled compound was

obtained as a yellow solid (1.159 g, 41 % Yield). <sup>1</sup>H NMR (400 MHz, CDCl<sub>3</sub>) δ 7.17 (t, *J* = 8.5 Hz, 1H), 6.63 – 6.55 (m, 3H), 6.56 – 6.48 (m, 2H), 3.86 (t, *J* = 6.6 Hz, 2H), 3.36 (s, 3H), 3.30 (s, 3H), 1.77 (m, *J* = 7.3 Hz, 2H), 1.01 (t, *J* = 7.4 Hz, 3H). <sup>13</sup>C NMR (101 MHz, CDCl<sub>3</sub>) δ 160.60, 159.30, 154.84, 138.05, 132.42, 130.15, 129.94, 127.44, 123.43, 108.49, 103.28, 101.48, 97.06, 69.60, 27.28, 27.22, 22.53, 10.53.

***N*-(1,3-Dimethyl-2-oxo-6-(3-propoxyphenoxy)-2,3-dihydro-1H-benzo[*d*]imidazol-5-yl)-3,4-dimethoxybenzenesulfonamide (4).**[42]

To the solution of **S15** (0.040 g, 0.122 mmol) in dry DCM (2 mL) 3,4-dimethoxybenzene-1-sulfonyl chloride (0.043 g, 0.183 mmol) and pyridine (0.0193 g, 0.244 mmol) were added and the reaction mixture was left at room temperature for 3 h. Then, the mixture was diluted with H<sub>2</sub>O, acidified with HCl 2N, and extracted with EA (3x 10 mL). Subsequently, the reunited organic phases were washed with brine (2x15 mL) and dried over Na<sub>2</sub>SO<sub>4</sub>. The crude was finally purified by automated flash chromatography on SiO<sub>2</sub> cartridge (DCM/MeOH, 90:10). The titled compound was obtained by as a yellow solid (0.025 g, 39% Yield). <sup>1</sup>H NMR (400 MHz, CDCl<sub>3</sub>) δ 7.38 (s, 1H), 7.27 – 7.23 (m, 1H), 7.06 – 7.01 (m, 2H), 6.80 (s, 1H), 6.73 (d, *J* = 8.5 Hz, 1H), 6.59 (dd, *J* = 8.3, 2.4 Hz, 1H), 6.43 (s, 1H), 6.16 (t, *J* = 2.4 Hz, 1H), 5.98 (dd, *J* = 8.2, 2.3 Hz, 1H), 3.88 (s, 3H), 3.83 (t, *J* = 6.6 Hz, 2H), 3.63 (s, 3H), 3.45 (s, 3H), 3.26 (s, 3H), 1.83 – 1.73 (m, 2H), 1.02 (t, *J* = 7.4 Hz, 3H). <sup>13</sup>C NMR (101 MHz, CDCl<sub>3</sub>) δ 160.54, 158.14, 154.79, 152.83, 148.97, 142.36, 130.24, 130.14, 127.99, 126.66, 122.49, 121.43, 110.13, 109.42, 109.22, 108.66, 103.88, 103.50, 99.54, 69.65, 56.07, 55.95, 27.50, 27.32, 22.49, 10.49. HRMS (ESI) *m/z* [M + H]<sup>+</sup> calcd for C<sub>26</sub>H<sub>29</sub>N<sub>3</sub>O<sub>7</sub>S 528.18045, found 528.18087. UPLC retention time: 5.503 min.

**3-propoxyphenol (S14)**[60].

To a solution of commercially available resorcinol (5.00 g, 45.413 mmol) in DMF (15 mL) K<sub>2</sub>CO<sub>3</sub> (3.138 g, 22.707 mmol) and 1-bromopropane (7.214 g, 59.037 mmol) were added. The reaction mixture was stirred at 70 °C overnight. The mixture was diluted with H<sub>2</sub>O (50 mL), acidified with HCl 2N, and extracted with EtOAc (25 mL x 5). The reunited organic phases were washed with H<sub>2</sub>O (30 mL x 6), brine (10 mL x 3), and dried over Na<sub>2</sub>SO<sub>4</sub>. After removing the solvent via rotavapory evaporation, the crude was purified by automated flash chromatography (PE/EtOAc, 80:20) to obtain **S14** (2.37 g, 34% Yield) as a yellow oil. <sup>1</sup>H NMR (400 MHz, CDCl<sub>3</sub>) δ 7.14 (t, *J* = 8.5 Hz, 1H), 6.52 (ddd, *J* = 8.2, 2.2, 1.0 Hz, 1H), 6.48 – 6.40 (m, 2H), 5.21 (bs, 1H), 3.91 (t, *J* = 6.6 Hz, 2H), 1.82 (m, *J* = 7.4 Hz, 2H), 1.05 (t, *J* = 7.4 Hz, 3H). <sup>13</sup>C NMR (101 MHz, CDCl<sub>3</sub>) δ 160.41, 156.68, 130.18, 107.80, 107.20, 102.18, 69.69, 22.52, 10.49.

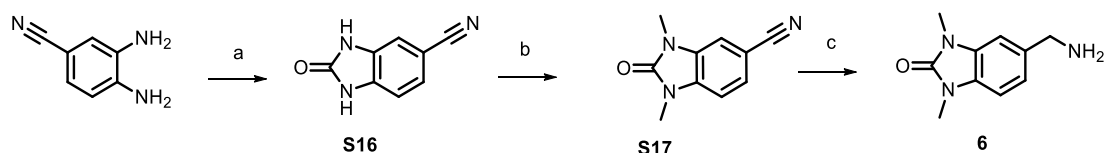

*Reagents and conditions:* (a) 1,1'-carbonyldiimidazole, dry THF, 95 °C, 1.5 h; (b) i. 60% NaH, dry THF, 0 °C-rt, 30 min; ii. CH<sub>3</sub>I, dry THF, rt, overnight; (c) Pd/C, P<sub>H2</sub> = 6.5 bar, dry EtOH:THF mixture (1:1), rt, overnight.

**2-Oxo-2,3-dihydro-1H-benzo[*d*]imidazole-5-carbonitrile (S16)**[62]

Under N<sub>2</sub> atmosphere, to the solution of 3,4-diaminobenzonitrile (0.200 g, 1.502 mmol) in dry THF (10 mL), *N,N'*-carbonyldiimidazole (0.536 g, 3.305 mmol) was added and the mixture was stirred at 95 °C for 1.5 h. Gradually cooled down the reaction mixture to 0 °C, then poured it in iced water (10 mL). Removed the THF by rotary evaporation from the mixture and subsequently acidified with HCl 2N (3 mL). The formed precipitate was subsequently filtered and washed with H<sub>2</sub>O (3 x 10 mL) to afford **S16** as a brown powder (0.235 g, 98 % Yield). <sup>1</sup>H NMR (400 MHz, DMSO-*d*<sub>6</sub>) δ 11.18 (s, 1H), 11.05 (s, 1H), 7.39 (dd, *J* = 8.1, 1.6 Hz, 1H), 7.32 – 7.30 (m, 1H), 7.06 (d, *J* = 8.1 Hz, 1H). <sup>13</sup>C NMR (101 MHz, DMSO-*d*<sub>6</sub>) δ 155.58, 134.15, 130.39, 126.31, 120.29, 111.82, 109.59, 102.70.

### 1,3-Dimethyl-2-oxo-2,3-dihydro-1H-benzo[d]imidazole-5-carbonitrile (**S17**).[63]

Under N<sub>2</sub> atmosphere, the solution of **S16** (0.308 g, 1.937 mmol) in dry THF (10 mL) was added at 0 °C to a suspension of NaH 60% (0.170 g, 4.426 mmol) in dry THF (5 mL) and stirred for 30 minutes. Iodomethane (0.962 g, 6.778 mmol) was added dropwise and the reaction mixture was stirred at room temperature overnight. The reaction mixture was quenched with EtOAc (10 mL), then diluted with H<sub>2</sub>O (10 mL) and extracted with EtOAc (10 mL x 5). The reunited organic phases were washed with brine (10 mL x 2), dried over Na<sub>2</sub>SO<sub>4</sub> and evaporated to dryness to give a crude which was purified by automated flash chromatography on SiO<sub>2</sub> cartridge (DCM/MeOH, 98:2) to afford **S17** as a white solid (0.265 g, 73% Yield). <sup>1</sup>H NMR (400 MHz, DMSO-*d*<sub>6</sub>) δ 7.66 (d, *J* = 1.5 Hz, 1H), 7.52 (dd, *J* = 8.1, 1.5 Hz, 1H), 7.30 (d, *J* = 8.1 Hz, 1H), 3.35 (s, 3H), 3.34 (s, 3H). <sup>13</sup>C NMR (101 MHz, DMSO-*d*<sub>6</sub>) δ 154.33, 133.76, 130.37, 126.45, 120.24, 11.34, 108.77, 103.00, 27.70, 27.69.

### 5-(Aminomethyl)-1,3-dimethyl-1H-benzo[d]imidazol-2(3H)-one (**6**).[63]

In a 12 mL vial, with septum screw cap and a needle, to the solution of **S17** (0.138 g, 0.740 mmol) in a mixture of THF/EtOH 1:1 (9.0 mL) Pd/C 10% (0.070 g) was added. The vial was inserted inside a stainless steel reactor, 3 cycles vacuum/H<sub>2</sub> were performed, and the reaction mixture was left at room temperature under H<sub>2</sub> atmosphere at 6.5 bar pressure overnight. After pressure release, the reaction mixture was filtered over a pad of celite and washed with THF (3 mL x 3). The solvent was evaporated to dryness and the crude was purified by automated flash chromatography on SiO<sub>2</sub> cartridge (DCM/MeOH, 80:20) to afford **6** as a white solid (0.063 g, 44% Yield). <sup>1</sup>H NMR (400 MHz, DMSO-*d*<sub>6</sub>) δ 7.13 (d, *J* = 0.8 Hz, 1H), 7.08 – 6.98 (m, 2H), 3.73 (s, 2H), 3.31 (s, 3H), 3.30 (s, 3H). <sup>13</sup>C NMR (101 MHz, DMSO-*d*<sub>6</sub>) δ 154.47, 137.98, 130.11, 128.65, 120.08, 107.54, 106.94, 46.38, 27.41, 27.34. HRMS (ESI) *m/z* [M + Na]<sup>+</sup> calcd for C<sub>10</sub>H<sub>13</sub>N<sub>3</sub>O 214.09563, found 214.09545. UPLC retention time: 2.586 min.

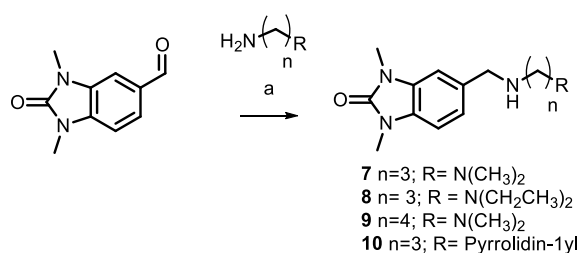

Reagents and conditions: (a) Na<sub>2</sub>SO<sub>4</sub>, NaBH<sub>4</sub>, DCM then MeOH, rt, overnight.

### General Procedure A for reductive amination

Under N<sub>2</sub> atmosphere, to the solution of commercially available 1,3-dimethyl-2-oxo-2,3-dihydro-1H-benzo[d]imidazole-5-carbaldehyde (1.0 equiv) in dry DCM, Na<sub>2</sub>SO<sub>4</sub> (catalytic amount) and the appropriate amine (1.2 equiv) were added. The reaction mixture was stirred at room temperature for 18 h. Then, the reaction mixture was filtered and the filtrate evaporated to dryness. The solid was dissolved in dry MeOH and at 0 °C NaBH<sub>4</sub> (2.0 equiv) was added. The mixture was then stirred at room temperature 18 h. The solvent was then evaporated *via* rotary evaporation by carefully avoiding light exposure and overheating and the crude was directly purified under dark as described below.

### 5-(((3-(Dimethylamino)propyl)amino)methyl)-1,3-dimethyl-1H-benzo[d]imidazol-2(3H)-one (**7**).

The titled compound was obtained by following representative procedure **A** using as reactant *N*<sub>1</sub>,*N*<sub>1</sub>-dimethylpropane-1,3-diamine (0.045 g, 0.441 mmol) and after purification by flash chromatography on SiO<sub>2</sub> (DCM/MeOH 9:1 then DCM/MeOH/Et<sub>3</sub>N 90:8:2) as a light yellow oil (0.055 g, 54% Yield). <sup>1</sup>H NMR (400 MHz, CDCl<sub>3</sub>) δ 7.03 (dd, *J* = 7.9, 1.5 Hz, 1H), 6.99 (d, *J* = 1.5 Hz, 1H), 6.89 (d, *J* = 7.9 Hz, 1H), 3.83 (s, 2H), 3.42 – 3.39 (m, 6H), 2.69 (t, *J* = 7.1 Hz, 2H), 2.36 – 2.29 (m, 2H), 2.21 (s, 6H), 1.69 (p, *J* = 7.2 Hz, 2H). <sup>13</sup>C NMR (101 MHz, CDCl<sub>3</sub>) δ 154.84, 133.86, 130.23, 129.09, 121.13, 107.31, 106.98, 58.10, 54.31, 47.94, 45.58 (2C), 28.03, 27.20 (2C). HRMS (ESI) *m/z* [M + H]<sup>+</sup> calcd for C<sub>15</sub>H<sub>24</sub>N<sub>4</sub>O 277.20284, found 277.20252. UPLC retention time: 2.451 min.

#### 5-(((3-(Diethylamino)propyl)amino)methyl)-1,3-dimethyl-1H-benzo[d]imidazol-2(3H)-one (8).

The titled compound was obtained by following general procedure A using as reactant *N*<sub>1</sub>,*N*<sub>1</sub>-diethylpropane-1,3-diamine (0.057 g, 0.441 mmol) and after purification by flash chromatography on SiO<sub>2</sub> (DCM/MeOH 9:1 then DCM/MeOH/Et<sub>3</sub>N 90:8:2) as a light yellow oil (0.038 g, 34% yield). <sup>1</sup>H NMR (400 MHz, CDCl<sub>3</sub>) δ 7.02 (dd, *J* = 7.9, 1.1 Hz, 1H), 6.99 (s, 1H), 6.88 (d, *J* = 7.9 Hz, 1H), 3.81 (s, 2H), 3.41 – 3.37 (m, 6H), 2.68 (t, *J* = 6.9 Hz, 2H), 2.54 – 2.45 (m, 6H), 1.73 – 1.63 (m, 2H), 0.99 (t, *J* = 7.1 Hz, 6H). <sup>13</sup>C NMR (101 MHz, CDCl<sub>3</sub>) δ 154.84, 133.68, 130.24, 129.11, 121.17, 107.36, 106.97, 54.26, 51.35, 48.34, 46.84 (2C), 27.21, 27.20, 27.05, 11.64 (2C). HRMS (ESI) *m/z* [M + H]<sup>+</sup> calcd for C<sub>17</sub>H<sub>28</sub>N<sub>4</sub>O 305.23414, found 305.23379. UPLC retention time: 1.332 min.

#### 5-(((4-(Dimethylamino)butyl)amino)methyl)-1,3-dimethyl-1H-benzo[d]imidazol-2(3H)-one (9).

The titled compound was obtained by following general procedure A using as reactant *N*<sub>1</sub>,*N*<sub>1</sub>-dimethylbutane-1,4-diamine (0.051 g, 0.441 mmol) and after purification by flash chromatography on SiO<sub>2</sub> (DCM/MeOH 9:1 then DCM/MeOH/Et<sub>3</sub>N 90:8:2) as a light yellow oil (0.039 g, 36% yield). <sup>1</sup>H NMR (400 MHz, CDCl<sub>3</sub>) δ 7.11 (s, 1H), 7.05 (dd, *J* = 7.9, 1.4 Hz, 1H), 6.90 (d, *J* = 7.9 Hz, 1H), 3.87 (s, 2H), 3.44 – 3.38 (m, 6H), 2.71 (t, *J* = 6.7 Hz, 2H), 2.30 (t, *J* = 7.0 Hz, 2H), 2.18 (s, 6H), 1.69 – 1.60 (m, 2H), 1.60 – 1.50 (m, 2H). <sup>13</sup>C NMR (101 MHz, CDCl<sub>3</sub>) δ 154.83, 133.05, 130.29, 129.25, 121.25, 107.51, 106.98, 59.51, 53.99, 49.19, 45.22 (2C), 27.81, 27.23, 27.22, 25.56. HRMS (ESI) *m/z* [M + H]<sup>+</sup> calcd for C<sub>16</sub>H<sub>26</sub>N<sub>4</sub>O 291.21849, found 291.21785. UPLC retention time: 1.306 min.

#### 1,3-Dimethyl-5-(((3-(pyrrolidin-1-yl)propyl)amino)methyl)-1H-benzo[d]imidazol-2(3H)-one (10).

The titled compound was obtained by following representative procedure A using as reactant 3-(pyrrolidin-1-yl)propan-1-amine (0.040 g, 0.315 mmol) and after purification by flash chromatography on SiO<sub>2</sub> (DCM/MeOH 9:1 then DCM/MeOH/Et<sub>3</sub>N from 90:9:1) as a light yellow oil (0.061 g, 76% yield). <sup>1</sup>H NMR (400 MHz, CDCl<sub>3</sub>) δ 7.03 – 6.99 (m, 1H), 6.97 (s, 1H), 6.88 (d, *J* = 7.9 Hz, 1H), 3.82 (s, 2H), 3.41 – 3.36 (m, 6H), 2.70 (t, *J* = 7.0 Hz, 2H), 2.54 – 2.46 (m, 6H), 1.79 – 1.70 (m, 6H). <sup>13</sup>C NMR (101 MHz, CDCl<sub>3</sub>) δ 154.83, 133.68, 130.24, 129.12, 121.13, 107.32, 106.98, 54.83, 54.26(2C), 54.17, 48.09(2C), 29.05, 27.21, 23.43(2C). HRMS (ESI) *m/z* [M + H]<sup>+</sup> calcd for C<sub>17</sub>H<sub>26</sub>N<sub>4</sub>O 303.21849, found 303.21808. UPLC retention time: 2.319 min.

### 2.3 Crystallographic studies

#### TRIM33α PHD-BRD expression and purification

The gene coding sequence for TRIM33α (residues 882-1087), cloned in the pET28a(+) vector (including a TEV-cleavable His<sub>6</sub>-tag) within the NdeI – XhoI restriction sites, was purchased from GenScript (Piscataway, NJ). The expression plasmid was introduced by thermal shock in the BL21(DE3) *E. coli* strain. Bacterial cells were grown in Luria-Bertani medium supplemented with 50 mg L<sup>-1</sup> kanamycin at 37 °C. Over-expression levels of the protein was obtained by 16 h of induction at 20 °C in the presence of 0.25 mM isopropyl β-D-1-thiogalactopyranoside (IPTG) and 0.1 mM zinc chloride when the OD<sub>600nm</sub> reached values between 0.6 – 0.8. Cells, harvested by centrifugation, were resuspended in buffer A (500 mM NaCl and 20 mM TRIS, pH 8) containing 20 mM imidazole and lysozyme (0.5 mg mL<sup>-1</sup>) and disrupted by sonication after 1 h incubation on ice. The soluble cellular fraction, separated by centrifugation (13500 x g, 1 h, 4 °C), was purified by nickel-affinity chromatography (HisTrap FF 5 mL column, GE Healthcare) following the manufacturer's instructions. Protein elution was achieved when the imidazole concentration reached 250 mM. Fractions containing the target protein, identified by SDS-PAGE analysis, were pooled, and extensively dialyzed in buffer A. His<sub>6</sub>-tag cleavage was performed during the dialysis by means of in-house produced His<sub>6</sub>-tagged TEV protease (HT-TEV) directly added inside the membrane (0.05 mg per mg of target protein)[64]. After 24 h, the tag cleavage was almost complete (> 98 %, verified by SDS-PAGE analysis), and the mature protein was subjected to a second nickel affinity chromatography. The effective tag removal was confirmed by western blot analysis using an HRP-conjugated His-tag monoclonal antibody (Thermo Fisher Scientific). The purity of the mature protein was estimated as > 98% by SDS-PAGE and MALDI-TOF mass spectrometry analyses. The final yield obtained after protein purification was 30 mg L<sup>-1</sup> bacterial culture for TRIM33α PHD-BRD.

## Crystallization

Before crystallization experiments, TRIM33  $\alpha$  PHD-BRD was concentrated to 15 mg mL<sup>-1</sup> in buffer B (100 mM NaCl and 20 mM TRIS, pH 8) added by 5 mM dithiothreitol. TRIM33 $\alpha$  PHD-BRD was crystallized as reported by Xi et al.[39], with minor modifications. Briefly, crystals of the protein were grown using the hanging and sitting drop vapour diffusion method[65] by mixing equal volumes of protein and precipitant (0.2 M calcium chloride and 20 % wt/vol PEG-3350) solution, equilibrated over a 500  $\mu$ L reservoir at 8 °C. Crystals grew within 24 hours and reached their maximum size by a week. The complexes of TRIM33 $\alpha$  PHD-BRD with 8, 9 and 10 were obtained by the soaking technique. Preformed protein crystals were soaked for 30 minutes with 10 mM of each compound (solubilized in DMSO, without exceeding a DMSO/crystal solution ratio of 1:9). Crystals of the complexes were transferred to the cryoprotectant solution (obtained by adding 20 % v/v ethylene glycol to the precipitant solutions) and then flash frozen in liquid nitrogen.

## Data collection, structure solution and refinement

Diffraction data were collected at 100 K using synchrotron radiation at the Diamond Light Source (DLS, Didcot, UK) beamline I04, equipped with an Eiger2 XE 16M detector. Data were integrated using XDS[66] and scaled with SCALA[67,68] from the CCP4 suite[69]. Crystals of TRIM33 $\alpha$  PHD-BRD in complex with 8, 9, and 10 belonged to the hexagonal space group P6<sub>5</sub>22. Molecular replacement was performed using the software Molrep[70] and the structure of TRIM33 $\alpha$  PHD-BRD (PDB id 3u5m[39], excluding non-protein atoms and water molecules) as searching model. All structures were refined through the program REFMAC5[71] from CCP4 suite. The molecular graphic software Coot[72] was used for manual rebuilding and modelling of missing atoms in the electron density and to add solvent molecules. In each structure, the inspection of the Fourier difference map clearly evidenced the presence of the ligand inside the KAc binding site that was modelled accordingly. The final models were inspected manually and checked with Coot and PROCHECK[73] and then validated through the Protein Data Bank (PDB) deposition tools. Structural figures were generated using the molecular graphic software CCP4 mg[74]. Data collection, processing, and refinement statistics are summarized in Table 5. Final coordinates and structure factors were deposited in the Protein Data Bank (PDB) under the codes 8BD8 (TRIM33 $\alpha$  PHD-BRD – 8), 8BDY (TRIM33 $\alpha$  PHD-BRD – 9), and 8BD9 (TRIM33 $\alpha$  PHD-BRD – 10).

**Table S6.** Data collection and processing and refinement statistics. Values for the outer shell are given in parentheses.

|                                                            | TRIM33 $\alpha$ PHD-BRD<br>compound 8 | TRIM33 $\alpha$ PHD-BRD<br>compound 9 | TRIM33 $\alpha$ PHD-BRD<br>compound 10 |
|------------------------------------------------------------|---------------------------------------|---------------------------------------|----------------------------------------|
| PDB ID codes                                               | 8BD8                                  | 8BDY                                  | 8BD9                                   |
| DATA COLLECTION STATISTICS                                 |                                       |                                       |                                        |
| Diffraction source                                         | I04 (DLS)                             | I04 (DLS)                             | I04 (DLS)                              |
| Wavelength (Å)                                             | 0.9795                                | 0.9795                                | 0.9795                                 |
| Temperature (K)                                            | 100                                   | 100                                   | 100                                    |
| Detector                                                   | Eiger2 XE 16M                         | Eiger2 XE 16M                         | Eiger2 XE 16M                          |
| Crystal–detector distance (mm)                             | 329.4                                 | 366.6                                 | 329.4                                  |
| Exposure time per image (s)                                | 0.1                                   | 0.005                                 | 0.1                                    |
| Space group                                                | P6 <sub>5</sub> 22                    | P6 <sub>5</sub> 22                    | P6 <sub>5</sub> 22                     |
| No. of subunits in ASU                                     | 1                                     | 1                                     | 1                                      |
| <i>a</i> = <i>b</i> , <i>c</i> (Å)                         | 80.01, 134.47                         | 79.96, 135.50                         | 79.95, 134.95                          |
| Resolution range (Å)                                       | 134.47–3.10 (3.27–3.10)               | 135.50–3.05 (3.21–3.05)               | 134.95–3.20 (3.37– 3.20)               |
| Total no. of reflections                                   | 38302 (5842)                          | 72965 (11190)                         | 17680 (2603)                           |
| No. of unique reflections                                  | 4853 (692)                            | 5355 (761)                            | 4598 (633)                             |
| Completeness (%)                                           | 97.6 (99.4)                           | 100.0 (100.0)                         | 99.5 (99.8)                            |
| Redundancy                                                 | 7.9 (8.4)                             | 13.6 (14.7)                           | 3.8 (4.1)                              |
| $\langle I/\sigma(I) \rangle$                              | 11.0 (2.3)                            | 10.0 (2.2)                            | 11.2 (2.3)                             |
| <i>R</i> <sub>meas</sub>                                   | 0.171 (1.186)                         | 0.189 (1.118)                         | 0.077 (0.625)                          |
| Overall <i>B</i> factor from Wilson plot (Å <sup>2</sup> ) | 64.5                                  | 69.0                                  | 100.3                                  |



| REFINEMENTS STATISTICS                                |                           |                           |                           |
|-------------------------------------------------------|---------------------------|---------------------------|---------------------------|
| Resolution range (Å)                                  | 69.30-3.10<br>(3.18-3.10) | 69.25-3.05<br>(3.13-3.05) | 61.68-3.20<br>(3.28-3.20) |
| Completeness (%)                                      | 96.4 (99.2)               | 99.98 (100.0)             | 99.3 (99.7)               |
| No. of reflections, working set                       | 4645 (335)                | 5062 (363)                | 4307 (291)                |
| No. of reflections, test set                          | 207 (16)                  | 256 (23)                  | 256 (21)                  |
| Final $R_{\text{cryst}}$                              | 0.2102 (0.293)            | 0.2287 (0.345)            | 0.2319 (0.359)            |
| Final $R_{\text{free}}$                               | 0.3383 (0.547)            | 0.3342 (0.511)            | 0.3485 (0.442)            |
| <b>No. of non-H atoms</b>                             |                           |                           |                           |
| Protein                                               | 1471                      | 1425                      | 1384                      |
| Inhibitor                                             | 12                        | 12                        | 12                        |
| Water                                                 | 19                        | 20                        | 5                         |
| Zn ions                                               | 2                         | 2                         | 2                         |
| Calcium ions                                          | 1                         | 1                         | 1                         |
| Total                                                 | 1505                      | 1460                      | 1404                      |
| R.m.s. deviations Bonds (Å)                           | 0.005                     | 0.008                     | 0.005                     |
| Angles (°)                                            | 1.679                     | 1.771                     | 1.413                     |
| Average $B$ factors (Å <sup>2</sup> )                 | 60.5                      | 69.3                      | 86.8                      |
| Estimate error on coordinates based on<br>R value (Å) | 0.615                     | 0.559                     | 0.652                     |
| <b>Ramachandran plot</b>                              |                           |                           |                           |
| Most favored (%)                                      | 82.1%                     | 85.9%                     | 83.5%                     |
| Allowed (%)                                           | 17.9%                     | 14.1%                     | 16.5%                     |
| RSCC Inhibitor                                        | 0.91                      | 0.93                      | 0.87                      |

## Bibliography

36. Sekirnik, A.R.; Reynolds, J.K.; See, L.; Bluck, J.P.; Scora, A.R.; Tallant, C.; Lee, B.; Leszczynska, K.B.; Grimley, R.L.; Storer, R.I.; et al. Identification of Histone Peptide Binding Specificity and Small-Molecule Ligands for the TRIM33 $\alpha$  and TRIM33 $\beta$  Bromodomains Published. *ACS Chem. Biol.* **2022**, *17*, 2753–2768. <https://doi.org/10.1021/acscchembio.2c00266>.
39. Xi, Q.; Wang, Z.; Zaromytidou, A.-I.; Zhang, X.H.-F.; Chow-Tsang, L.-F.; Liu, J.X.; Kim, H.; Barlas, A.; Manova-Todorova, K.; Kaartinen, V. A Poised Chromatin Platform for TGF- $\beta$  Access to Master Regulators. *Cell* **2011**, *147*, 1511–1524. <https://doi.org/10.1016/j.cell.2011.11.032>.
42. Palmer, W.S.; Poncet-montange, G.; Liu, G.; Petrocchi, A.; Reyna, N.; Subramanian, G.; Thero, J.; Yau, A.; Kostalimova, M.; Bardenhagen, J.P.; et al. Structure-Guided Design of IACS-9571, a Selective High-Affinity Dual TRIM24-BRPF1 Bromodomain Inhibitor. *J. Med. Chem.* **2015**, *59*, 1440–1454. <https://doi.org/10.1021/acs.jmedchem.5b004055>.
57. Tsai, W.-W.; Wang, Z.; Yiu, T.T.; Akdemir, K.C.; Xia, W.; Winter, S.; Tsai, C.-Y.; Shi, X.; Schwarzer, D.; Plunkett, W. TRIM24 Links a Non-Canonical Histone Signature to Breast Cancer. *Nature* **2010**, *468*, 927–932. <https://doi.org/10.1038/nature09542>.
60. Zeng, L.; Yap, K.L.; Ivanov, A. V.; Wang, X.; Mujtaba, S.; Plotnikova, O.; Rauscher III, F.J.; Zhou, M.-M. Structural Insights into Human KAP1 PHD Finger–Bromodomain and Its Role in Gene Silencing. *Nat. Struct. Mol. Biol.* **2008**, *15*, 626–633. doi:10.1038/nsmb.1416.
61. Burdick, D.J.; Liang, J. Preparation of Pyrimidines as Aurora Kinase Inhibitors. Patent WO2007120339, 2007 October 25.
62. Steeneck, C.; Gege, C.; Richter, F.; Hochguertel, M.; Feuerstein, T.; Bluhm, H. Preparation of Amide Containing Heterobicyclic Metalloprotease Inhibitors. Patent WO2006128184, 2007 March 08.
63. Stazi, G.; Battistelli, C.; Piano, V.; Mazzone, R.; Marrocco, B.; Marchese, S.; Louie, S.M.; Zwergel, C.; Antonini, L.; Patsilinos, A.; et al. Development of Alkyl Glycerone Phosphate Synthase Inhibitors: Structure-Activity Relationship and Effects on Ether Lipids and Epithelial-Mesenchymal Transition in Cancer Cells. *Eur. J. Med. Chem.* **2019**, *163*, 722–735. doi:10.1016/j.ejmech.2018.11.050.
64. Kapust, R.B.; Tözsér, J.; Fox, J.D.; Anderson, D.E.; Cherry, S.; Copeland, T.D.; Waugh, D.S. Tobacco Etch Virus Protease: Mechanism of Autolysis and Rational Design of Stable Mutants with Wild-Type Catalytic Proficiency. *Protein Eng.* **2001**, *14*, 993–1000.
65. Benvenuti, M.; Mangani, S. Crystallization of Soluble Proteins in Vapor Diffusion for X-Ray Crystallography. *Nat. Protoc.* **2007**, *2*, 1633–1651.
66. Kabsch, W. Xds. *Acta Crystallogr. Sect. D Biol. Crystallogr.* **2010**, *66*, 125–132.
67. Evans, P.R. An Introduction to Data Reduction: Space-Group Determination, Scaling and Intensity Statistics. *Acta Crystallogr. Sect. D Biol. Crystallogr.* **2011**, *67*, 282–292. doi:10.1107/S090744491003982X.
68. Evans, P. Scaling and Assessment of Data Quality. *Acta Crystallogr. Sect. D Biol. Crystallogr.* **2006**, *62*, 72–82. doi:10.1107/S0907444905036693.
69. Winn, M.D.; Ballard, C.C.; Cowtan, K.D.; Dodson, E.J.; Emsley, P.; Evans, P.R.; Keegan, R.M.; Krissinel, E.B.; Leslie, A.G.W.; McCoy, A.; et al. Overview of the CCP4 Suite and Current Developments. *Acta Crystallogr. Sect. D Biol. Crystallogr.* **2011**, *67*, 235–242. doi:10.1107/S0907444910045749.
70. Vagin, A.; Teplyakov, A. Molecular Replacement with MOLREP. *Acta Crystallogr. Sect. D Biol. Crystallogr.* **2010**, *66*, 22–25.
71. Murshudov, G.N.; Skubák, P.; Lebedev, A.A.; Pannu, N.S.; Steiner, R.A.; Nicholls, R.A.; Winn, M.D.; Long, F.; Vagin, A.A. REFMAC5 for the Refinement of Macromolecular Crystal Structures. *Acta Crystallogr. Sect. D Biol. Crystallogr.* **2011**, *67*, 355–367.
72. Emsley, P.; Lohkamp, B.; Scott, W.G.; Cowtan, K. Features and Development of Coot. *Acta Crystallographica Section D: Biological Crystallography* **2010**, *66*, 486–501.
73. Laskowski, R.A.; MacArthur, M.W.; Moss, D.S.; Thornton, J.M. IUCr. PROCHECK: a program to check the stereochemical quality of protein structures. *J. appl. Crystallogr.* **1993**, *26*, 283–291.
74. Potterton, E.; McNicholas, S.; Krissinel, E.; Cowtan, K.; Noble, M. The CCP4 Molecular-Graphics Project. *Acta Crystallogr. Sect. D Biol. Crystallogr.* **2002**, *58*, 1955–1957.
